# Supplementary material
Source: PubMed Central journal article supplement (PMC7871704)
Supplement: NIHMS1650490-supplement-Supplement.pdf [file NIHMS1650490-supplement-Supplement.pdf]

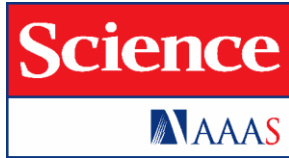

## Supplementary Materials for

### **Comprehensive quantification of fuel use by the failing and nonfailing human heart**

Danielle Murashige\*, Cholsoon Jang\*, Michael Neinast, Jonathan J. Edwards, Alexis Cowan,  
Matthew C. Hyman, Joshua D. Rabinowitz, David S. Frankel, Zolt Arany†

\*These authors contributed equally to this work.

†Corresponding author. Email: [zarany@pennmedicine.upenn.edu](mailto:zarany@pennmedicine.upenn.edu)

Published 16 October 2020, *Science* **370**, 364 (2020)

DOI: 10.1126/science.abc8861

#### **This PDF file includes:**

Materials and Methods  
Figs. S1 to S10  
Tables S1 to S10  
Captions for Data S1 and S2  
References

#### **Other Supplementary Material for this manuscript includes the following:**

(available at [science.sciencemag.org/content/370/6514/364/suppl/DC1](https://science.sciencemag.org/content/370/6514/364/suppl/DC1))

MDAR Reproducibility Checklist  
Data S1 and S2

## **Materials and Methods**

### **Study Population and Sample Collection**

All patients were undergoing elective radiofrequency catheter ablation for treatment of atrial fibrillation or ventricular tachycardia. The study protocol was approved by the Institutional Review Board of the Hospital of the University of Pennsylvania (Federalwide Assurance #00004028, Board #1 Protocol #827174). All study participants provided written informed consent. All patients were >18 years of age and non-pregnant. All patients had fasted overnight and were under general anesthesia with propofol, remifentanyl, etomidate, and succinylcholine. Following induction of general anesthesia, a 20-gauge catheter was inserted into the radial artery to continuously monitor blood pressure. Hemostatic sheaths were inserted into the femoral veins. One of these sheaths was exchanged for a long SLO™ sheath (Abbott, Chicago, IL) which was advanced over a diagnostic catheter into the coronary sinus. Within 60 minutes of induction of anesthesia, samples were simultaneously drawn from the radial artery, femoral vein, and coronary sinus. All blood samples were drawn prior to initiation of ablation. Mean right and left atrial chamber pressures were measured immediately prior to and following transseptal puncture and are reported as the average of the two measurements recorded by the two transseptal sheaths. Echocardiographic findings are reported from the most recent echocardiogram done prior to procedure. Blood samples were collected in lithium-heparin treated vacutainers and placed immediately on ice. Plasma was separated by centrifugation at 3,000g at 4°C for 10 minutes, and all samples were stored at -80°C until analysis. Blood oxygen content was measured in arterial, coronary sinus, and femoral venous samples of 17 patients at the time of sample collection using an ABL90 FlexPlus blood gas analyzer (Radiometer, Brea, CA).

### **Metabolite extraction**

Plasma (5 µL) was mixed with 150 µL -20°C 40:40:20 methanol:acetonitrile:water (extraction solvent), vortexed, and immediately centrifuged at 16,000 x g for 10 min at 4°C. The supernatant was collected for LC-MS analysis. [U-<sup>13</sup>C]-valine was spiked in the extraction solvent as an internal standard to account for instrument variability. Quantification of hypoxanthine, uric acid, and 3-hydroxybutyrate was performed by spiking known concentrations of [U-<sup>13</sup>C]-hypoxanthine and [U-<sup>13</sup>C]-3-hydroxybutyrate in individual patient samples or by fitting to a standard curve of uric acid.

### **Metabolite measurement by LC-MS**

A quadrupole-orbitrap mass spectrometer (Q Exactive, Thermo Fisher Scientific, San Jose, CA) operating in negative or positive ion mode was coupled to hydrophilic interaction chromatography via electrospray ionization and used to scan from m/z 70 to 1000 at 1 Hz and 140,000 resolution. LC separation was on a XBridge BEH Amide column (2.1 mm x 150 mm, 2.5 µm particle size, 130 Å pore size; Waters, Milford, MA) using a gradient of solvent A (20 mM ammonium acetate, 20 mM ammonium hydroxide in 95:5 water: acetonitrile, pH 9.45) and solvent B (acetonitrile). Flow rate was 150 µL/min. The LC gradient was: 0 min, 85% B; 2 min, 85% B; 3 min, 80% B; 5 min, 80% B; 6 min, 75% B; 7 min, 75% B; 8 min, 70% B; 9 min, 70% B; 10 min, 50% B; 12 min, 50% B; 13 min, 25% B; 16 min, 25% B; 18 min, 0% B; 23 min, 0% B; 24 min, 85% B; 30 min, 85% B. Autosampler temperature was 5°C, and injection volume was 3 µL. Data were analyzed using the MAVEN software. Metabolites were confirmed by exact mass and retention time match to authenticated standards.

### **Measurement of acetate**

Acetate was derivatized and measured by LC-MS. The derivatizing reagent was 12 mM EDC, 15 mM 3-Nitrophenylhydrazine and pyridine (2% v/v) in methanol. Reaction was stopped with quenching reagent consisting of 0.5 mM beta-mercaptoethanol in water. Serum (5  $\mu$ L) was mixed with derivatizing reagent (100  $\mu$ L) and incubated for 1 hour at 4°C. Then, the samples were centrifuged at 16,000 x g for 10 min at 4°C, and 20  $\mu$ L of supernatant was mixed with 200  $\mu$ L of the quenching reagent. After centrifugation at 16,000 x g for 10 min at 4°C, supernatants were collected for LC-MS analysis. A quadrupole-time of flight mass spectrometer (Q-TOF, Agilent, Santa Clara, CA) operating in negative ion mode was coupled to C18 chromatography via electrospray ionization and used to scan from m/z 100 to 300 at 1 Hz and 15,000 resolution. LC separation was on an Acquity UPLC BEH C18 column (2.1 mm x 100 mm, 1.7  $\mu$ m particle size, 130 Å pore size; Waters, Milford, MA) using a gradient of solvent A (0.01% formic acid in water) and solvent B (0.01% formic acid in isopropanol). Flow rate was 400  $\mu$ L/min, except that from 6 min to 8 min flow rate was increased to 700  $\mu$ L/min. The LC gradient was: 0 min, 10% B; 2 min, 15% B; 5 min, 25% B; 6 min, 100% B; 8 min, 100% B; 8.6 min, 10% B; 10.5 min, 10% B. Autosampler temperature was 5°C, and injection volume was 10  $\mu$ L. Ion masses for derivatized acetate was 208.

### **Measurement of glucose, lactate, glutamine, glutamate**

Glutamine, glutamate, glucose, and lactate concentrations were measured using a YSI 2900 Series Biochemistry Analyzer (YSI Inc./Xylem Inc., Yellow Springs, OH). System buffer (YSI 2357), standards (YSI 2776, YSI 1531, YSI 1530, YSI 2736, YSI 2755, YSI 2737, YSI 2756), membranes (YSI 2365, YSI 2329, YSI 2735, YSI 2754) were purchased from YSI Inc./Xylem Inc. (Yellow Springs, OH). For glucose/lactate measurement, plasma samples were diluted 1:2 in water for a final sample volume of 25  $\mu$ l. For glutamine/glutamate measurement, 20  $\mu$ l of plasma was directly measured. Reported values are an average of two readings per patient sample.

### **Insulin measurement**

Insulin concentrations were determined in triplicate using the commercially available Insulin Human ELISA kit (Crystal Chem cat number 90095, lot number 911554; Elk Grove Village, IL).

### **Calculations and Statistical Analysis**

Peak intensities for all 277 circulating metabolites were normalized to the median arterio-venous ratio for each patient's paired arteriovenous comparison. Metabolomics data were corrected according to the Benjamini-Hochberg method using a false-discovery rate cutoff of 0.05 to determine statistical significance. For metabolites where concentration was directly measured (listed in Table S4), the patient-specific concentration of each metabolite was used for subsequent calculations. For all other metabolites, the absolute concentrations were taken from the Human Metabolome Database. For flux calculations that required coronary blood flow, a value of ~0.8 ml/min/g cardiac tissue was assumed.

### **Calculation of amino acid clearance**

Cardiac amino acid release from proteolysis was calculated using the net amino acid A-V nitrogen balance across the heart and the average overall amino acid composition of muscle protein (14–

17, 40). For all calculations, each patient’s measured amino acid concentration was used for those amino acids listed in Table S5. Published concentrations were used for methionine, glycine, cysteine, and aspartate.

The net A-V nitrogen balance from amino acid uptake and release was calculated for each patient according to:

$$\Delta N_{A.A.} = \sum([N_{A.A.}]_{C.S.} - [N_{A.A.}]_{Art})$$

where  $N_{A.A.}$  represents total amino acid nitrogen concentration. For a given amino acid  $i$  ( $A. A. _i$ ), the net uptake or release of  $A. A. _i$  is dictated by the net liberation of  $A. A. _i$  from proteolysis and net metabolic combustion of  $A. A. _i$ :

$$\Delta[A. A. _i]_{AV} = [A. A. _i]_{C.S.} - [A. A. _i]_{Art}$$

$$\Delta[A. A. _i]_{AV} = [\text{net liberation of } A. A. _i \text{ from protein}] - [\text{net combustion of } A. A. _i]$$

The net liberation of  $A. A. _i$  from protein was calculated using the net amino acid A-V nitrogen balance and the typical composition of muscle protein using the following:

$$\text{net liberation of } A. A. _i \text{ from protein} = a_i \left( \frac{\Delta N_{A.A.}}{k} \right)$$

where  $a_i$  is the abundance of amino acid  $i$  in protein and  $k$  is the average weighted nitrogen content per amino acid in myocardial protein. A value of  $k = 1.38$  was used here. Thus, net myocardial combustion of  $A. A. _i$ :

$$\text{net combustion of } A. A. _i = a_i \left( \frac{\Delta N_{A.A.}}{k} \right) - \Delta[A. A. _i]_{AV}$$

Several corrections were performed to account for the interconversion of amino acids to other combusted fuels (e.g. alanine, lactate) or the release of modified intermediates (e.g. arginine, n-acetyl-arginine). All of the following corrections were handled for each patient individually using his or her A/V ratios and measured plasma concentrations (where available) or published values. For all scenarios listed in the table below, the “net contribution to combustion” was used to calculate net contribution to myocardial O<sub>2</sub> consumption and ATP synthesis. Appropriate consideration was made in cases where the number of carbons differs among metabolites (e.g. cystine C<sub>6</sub>H<sub>12</sub>N<sub>2</sub>O<sub>4</sub>S<sub>2</sub> vs. cysteine C<sub>3</sub>H<sub>7</sub>NO<sub>2</sub>S). In the table below, metabolites are listed under “uptake” or “release” based on whether each metabolite is typically taken up or released by the heart; however, the net combustion of these metabolites in each patient was ultimately handled on a case-by-case basis.

| Special Case                                              | Contribution from metabolite uptake | Contribution from proteolysis                                                | Deduction from metabolite release                                                                                                                | Net contribution to combustion                                                                                                                                                                                                                                  |
|-----------------------------------------------------------|-------------------------------------|------------------------------------------------------------------------------|--------------------------------------------------------------------------------------------------------------------------------------------------|-----------------------------------------------------------------------------------------------------------------------------------------------------------------------------------------------------------------------------------------------------------------|
| Lactate, Alanine                                          | $\Delta \text{Lactate}_{A-V}$       | $\Delta \text{Ala}_{\text{protein}}$                                         | $\Delta \text{Ala}_{A-V}$                                                                                                                        | Net lactate combustion =<br>$\Delta \text{Lactate}_{A-V} + \Delta \text{Ala}_{\text{protein}} - \Delta \text{Ala}_{A-V}$                                                                                                                                        |
| Glutamate, Glutamine                                      | $\Delta \text{Glu}_{A-V}$           | $\Delta \text{Gln}_{\text{protein}}$<br>$\Delta \text{Glu}_{\text{protein}}$ | $\Delta \text{Gln}_{A-V}$                                                                                                                        | Net Glu combustion = $\Delta \text{Glu}_{A-V}$<br>+ $\Delta \text{Gln}_{\text{protein}}$<br>+ $\Delta \text{Glu}_{\text{protein}} - \Delta \text{Gln}_{A-V}$                                                                                                    |
| Glycine, Serine, 2-hydroxyhippuric acid, N-acetyl-glycine |                                     | $\Delta \text{Gly}_{\text{protein}}$<br>$\Delta \text{Ser}_{\text{protein}}$ | $\Delta \text{Gly}_{A-V}$<br>$\Delta \text{Ser}_{A-V}$<br>$\Delta 2\text{-hydroxyhippuric acid}_{A-V}$<br>$\Delta \text{N-acetyl-glycine}_{A-V}$ | Net Ser combustion = $\Delta \text{Ser}_{A-V}$<br>+ $\Delta \text{Gly}_{\text{protein}}$<br>+ $\Delta \text{Ser}_{\text{protein}}$<br>- $\Delta \text{Gly}_{A-V}$<br>- $\Delta 2\text{-hydroxyhippuric acid}_{A-V}$<br>- $\Delta \text{N-acetyl-glycine}_{A-V}$ |
| Proline, Hydroxyproline                                   |                                     | $\Delta \text{Pro}_{\text{protein}}$                                         | $\Delta \text{Pro}_{A-V}$<br>$\Delta \text{hydroxyproline}_{A-V}$                                                                                | Net Pro combustion =<br>$\Delta \text{Pro}_{\text{protein}}$<br>- $\Delta \text{Pro}_{A-V}$<br>- $\Delta \text{hydroxyproline}_{A-V}$                                                                                                                           |
| Arginine, N-acetyl-arginine                               |                                     | $\Delta \text{Arg}_{\text{protein}}$                                         | $\Delta \text{Arg}_{A-V}$<br>$\Delta \text{N-acetyl-arg.}_{A-V}$                                                                                 | Net Arg combustion =<br>$\Delta \text{Arg}_{\text{protein}}$<br>- $\Delta \text{Arg}_{A-V}$<br>- $\Delta \text{N-acetyl-arg.}_{A-V}$                                                                                                                            |
| Methionine, Homocysteine                                  |                                     | $\Delta \text{Met}_{\text{protein}}$                                         | $\Delta \text{Met}_{A-V}$<br>$\Delta \text{homocysteine}_{A-V}$                                                                                  | Net Met combustion =<br>$\Delta \text{Met}_{\text{protein}}$<br>- $\Delta \text{Met}_{A-V}$<br>- $\Delta \text{homocysteine}_{A-V}$                                                                                                                             |
| Cystine, Methylcysteine                                   |                                     | $\Delta \text{Cys}_{\text{protein}}$                                         | $\Delta \text{Cys}_{A-V}$<br>$\Delta \text{methylcysteine}_{A-V}$                                                                                | Net Cys combustion =<br>$\Delta \text{Cys}_{\text{protein}} - \Delta \text{Cys}_{A-V}$<br>- $\Delta \text{methylcysteine}_{A-V}$                                                                                                                                |

### Calculation of oxygen requirements and ATP yield

Predicted oxygen requirements for substrate catabolism were based on theoretical full oxidation of metabolites that were consumed by the heart:

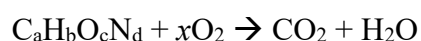

For amino acids, the concentration of metabolite consumed was calculated based on the net combustion of each amino acid as calculated above. In the case of alanine and glutamine, both of which are net released after adjustment for catabolism of amino acid from protein, the equivalent

oxygen requirement to fully combust the released quantity of amino acid was subtracted from lactate and glutamate, respectively. Amino acids that cannot be catabolized by the heart (Phe, His, Tyr) (41) were not included in calculation of predicted oxygen requirement for full catabolism of consumed substrates (**Fig. 3A**).

Calculation of substrate contribution to cardiac ATP production was performed using published values of ATP yields from substrate oxidation (42–44). Values for amino acid combustion ( $\mu\text{M}$  amino acid) were the same as those used to calculate oxygen requirements.

ATP yield from unmeasured LpFA and FFA (**Fig. 3B**, gray) was calculated assuming that  $\text{O}_2$  consumption due to unmeasured metabolites (**Fig. 3A**, gray) was due to complete oxidation of FAs in proportion to their measured concentrations in arterial plasma.

### Adjustment of metabolite extraction

To account for presumed lower myocardial blood flow in patients with reduced EF, the extracted amount of acetate, 3-hydroxybutyrate and glutamate in patients with rEF was scaled in **Fig. 4B** and **Fig. S10** according to:

$$(C_{CS}-C_A)_{\text{scaled}} = k(C_{CS}-C_A)_{\text{raw}}$$

where:

$$k = \frac{1-y}{1-z}$$

$$y = \text{average} \left[ \left( \frac{C_{CS}}{C_A} \right)_{\text{acetate, pEF}} \right]$$

$$z = \text{average} \left[ \left( \frac{C_{CS}}{C_A} \right)_{\text{acetate, rEF}} \right]$$

**Fig. S1.**

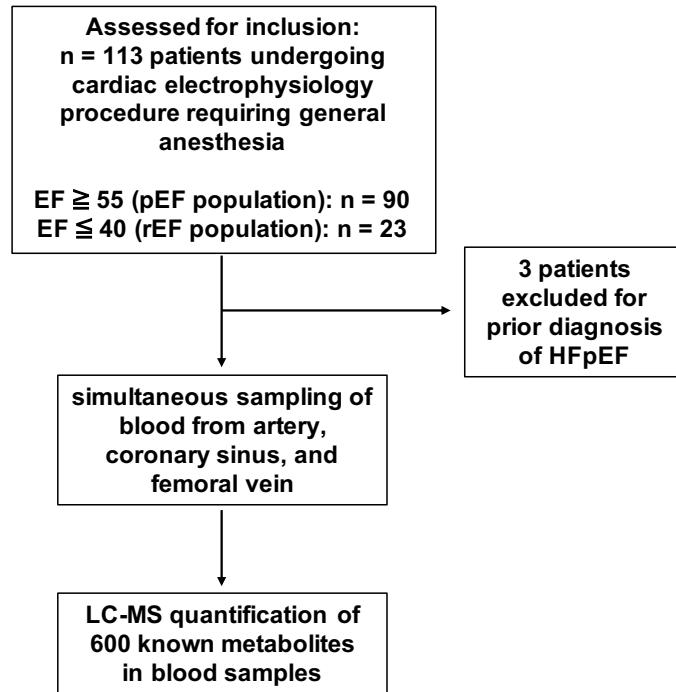

**Fig. S1.** Study design.

Fig. S2.

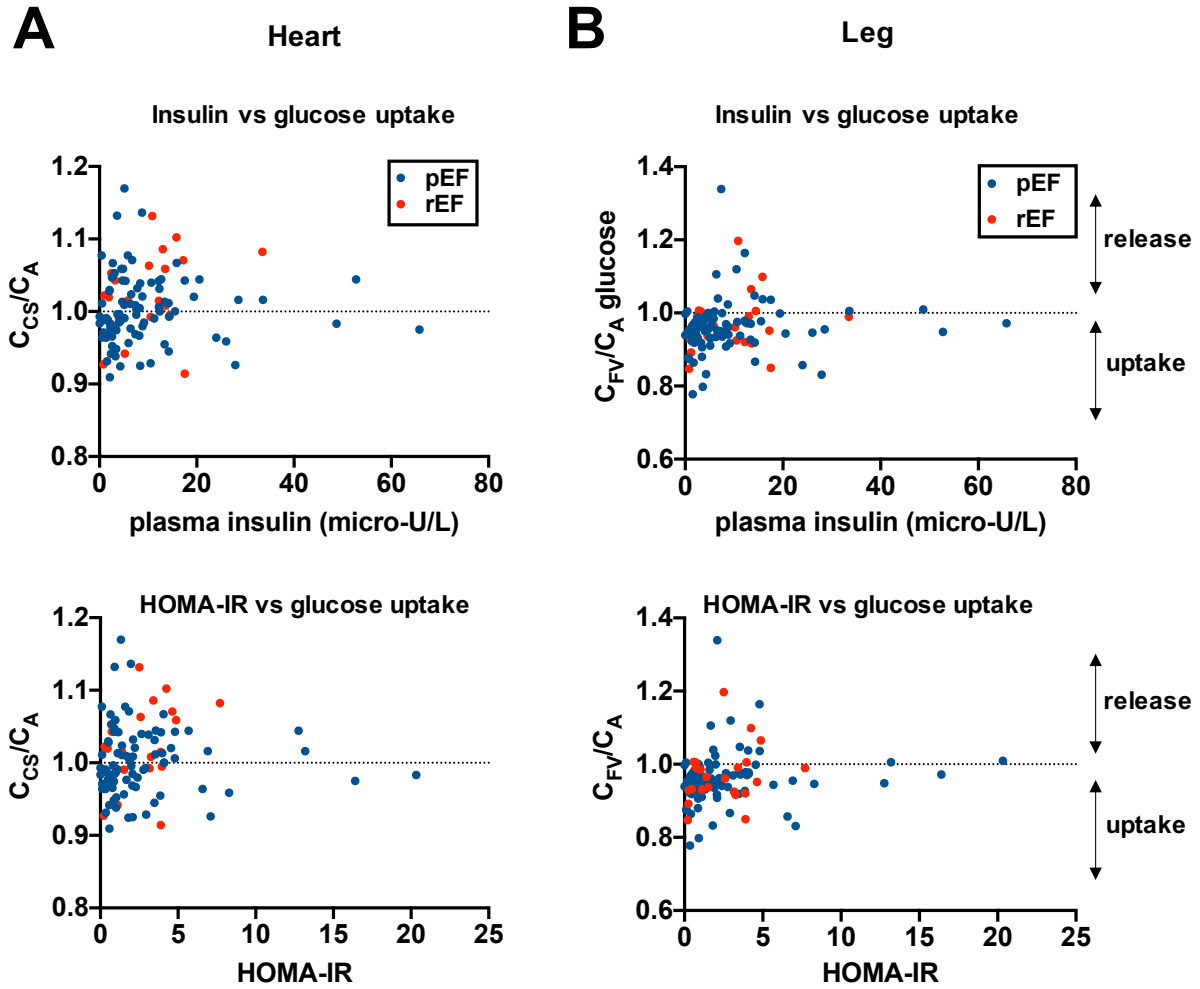

**Fig. S2. Relationship between plasma insulin, HOMA-IR and glucose uptake by the heart and leg in pEF and rEF.** Plasma insulin was measured from arterial plasma;  $C_{CS}/C_A$  (A) or  $C_{FV}/C_A$  (B) > 1 corresponds to glucose release;  $C_{CS}/C_A$  or  $C_{FV}/C_A$  < 1 corresponds to glucose uptake.



Fig. S3.

**A**

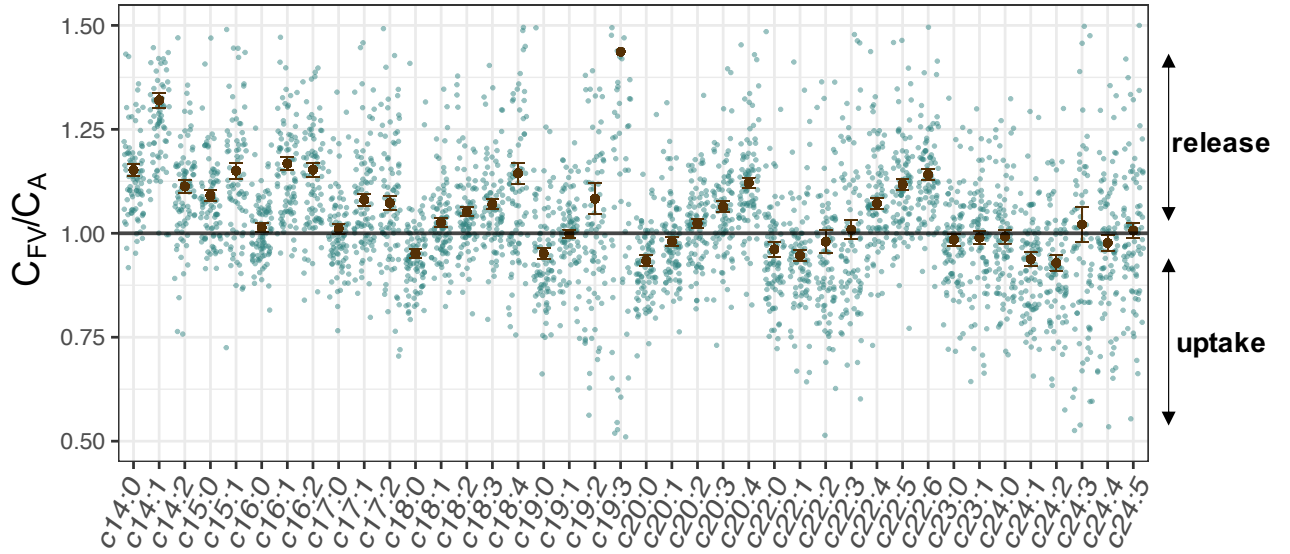

**B**

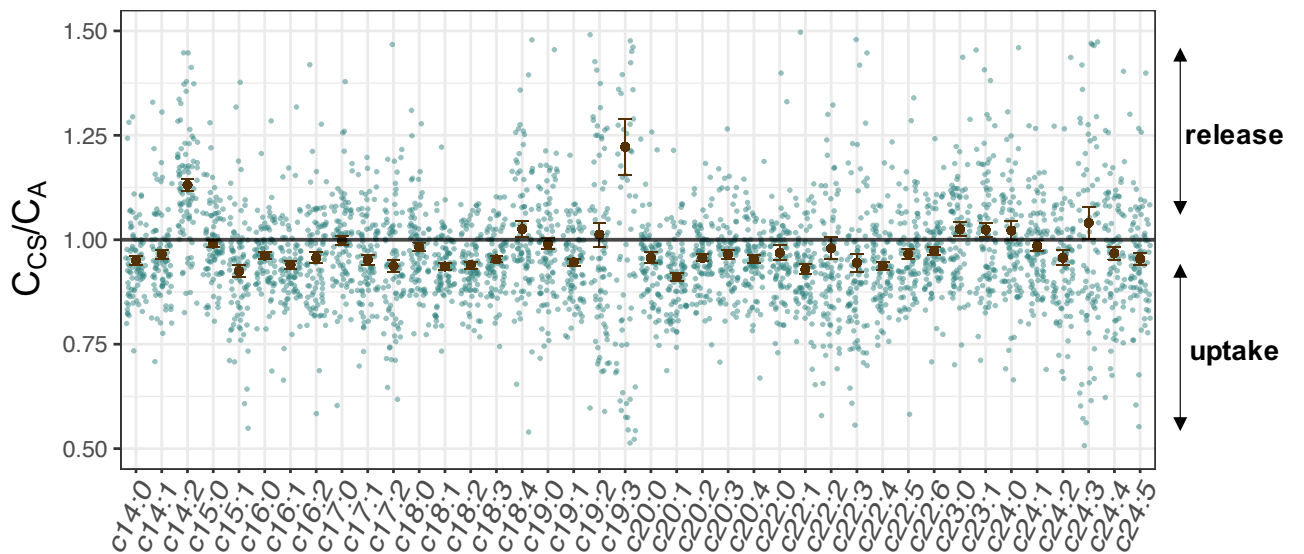

**Fig. S3.** Free fatty acid balance across the leg (A) and heart (B) depicted as  $C_{FV}/C_A$  or  $C_{CS}/C_A$ , respectively;  $C_{CS}/C_A$  or  $C_{FV}/C_A > 1$  corresponds to release;  $C_{CS}/C_A$  or  $C_{FV}/C_A < 1$  corresponds to uptake.

Fig. S4.

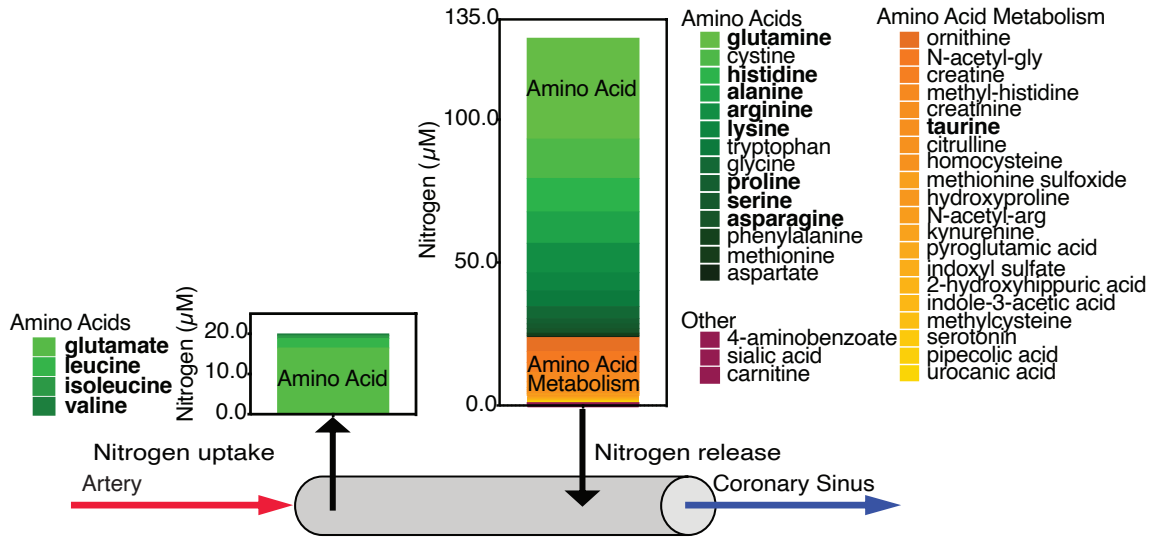

**Fig. S4. Total nitrogen release by the heart**

(A) Total average nitrogen (N) uptake or release ( $\mu\text{M N}$ ) by the heart in the form of amino acids and amino acid metabolites. Metabolites in bold were measured directly in plasma. All N-containing amino acids, modified amino acids, and intermediates in amino acid catabolism with average  $|C_{CS} - C_A| > 0.1 \mu\text{M}$  are included.

Fig. S5.

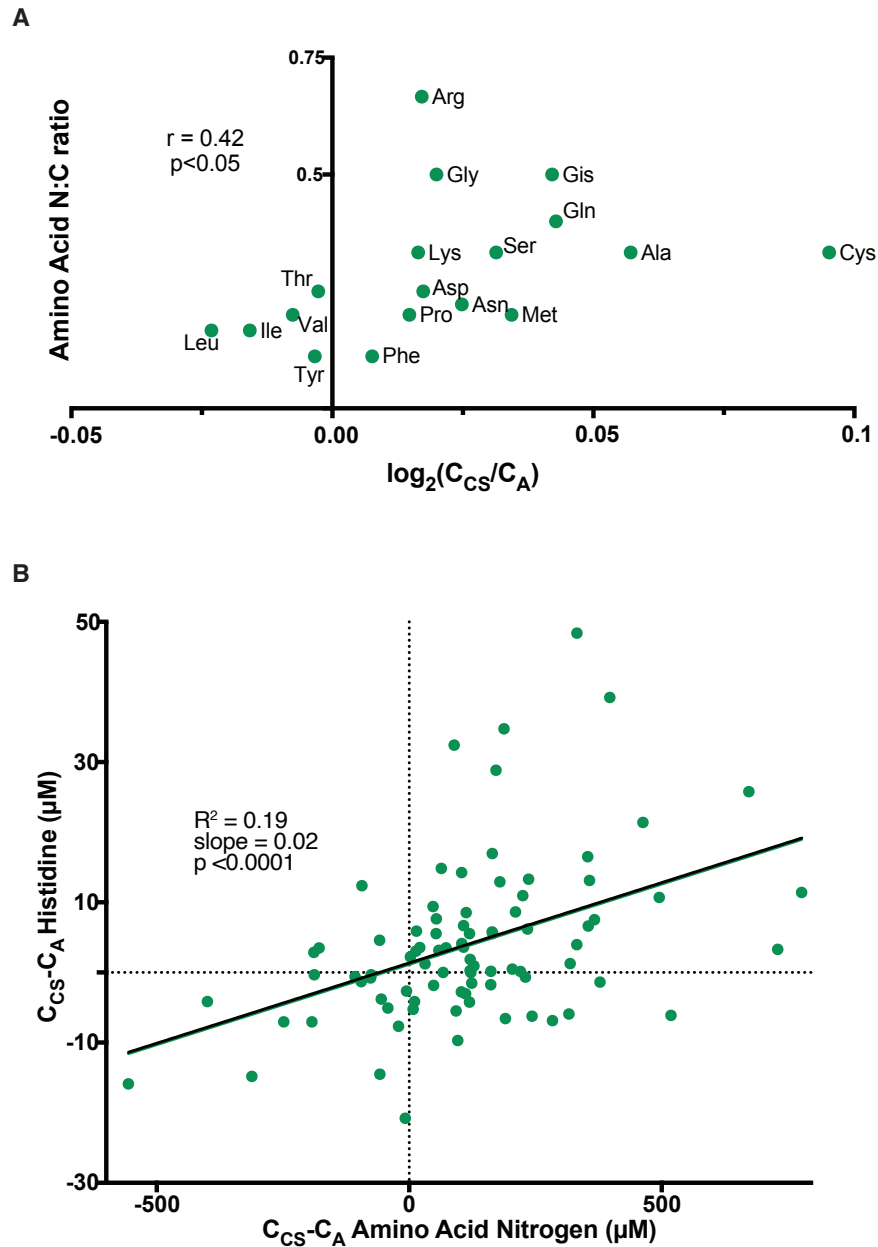

**Fig. S5. Preferential release of nitrogen-rich amino acids by the heart**

**(A)** Linear regression of cardiac uptake or release of indicated amino acid ( $\log_2 C_{CS}/C_A$ ) vs. each amino acid's N:C ratio. Data reflect directly measured amino acid concentrations in all patients. P and r values computed by Pearson correlation. **(B)** Linear regression of each patient's cardiac amino acid-derived nitrogen balance vs. cardiac histidine release based on directly quantified amino acids in plasma. Positive values indicate release. p value calculated by F-test.

Fig. S6.

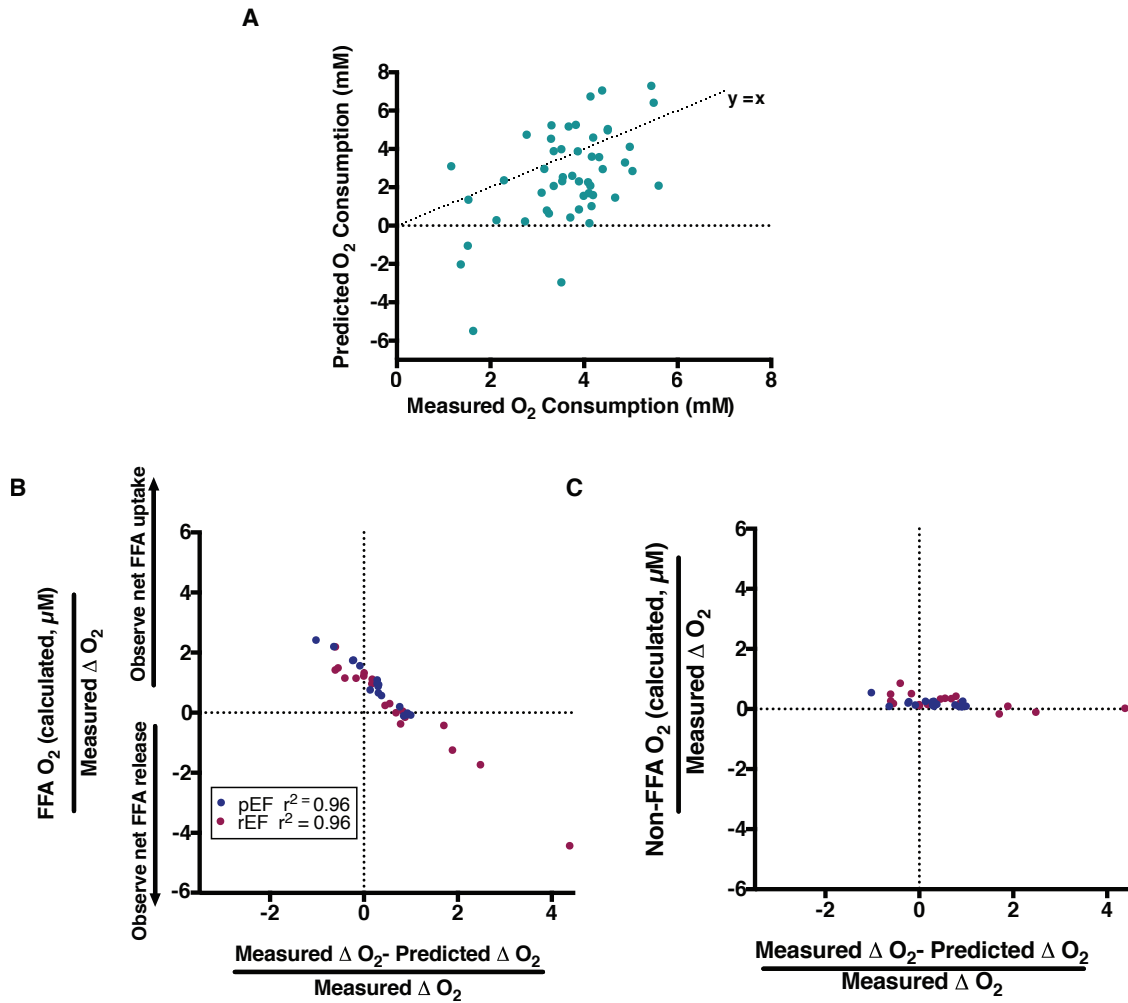

Fig. S6.

**A.** Comparison of predicted myocardial oxygen consumption based on metabolite use against measured oxygen consumption. Data are from those patients where oxygen consumption values were available (17 pEF, 19 rEF).

**B-C.** Observed myocardial FFA consumption (**B**) or non-FFA consumption (**C**). In both **B-C**, y axis expressed as fraction of measured  $\Delta O_2$  required to combust all consumed FFAs (**B**) or non-FFA species (**C**); x axis represents proportion of total measured  $\Delta O_2$  that is unaccounted for by predicted  $\Delta O_2$ . Each circle represents a patient.

**Fig. S7.**

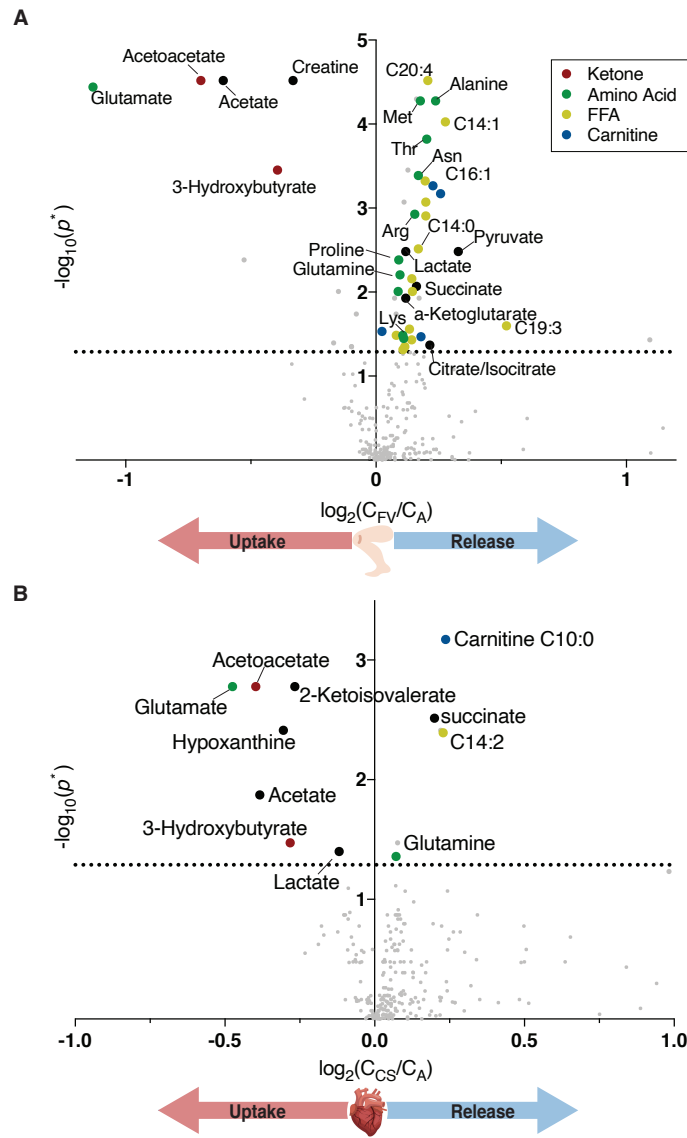

**Fig. S7. Metabolite uptake and release profiles in the heart and leg among rEF cohort.** Volcano plot depicts metabolite abundance in the femoral vein (**A**) or (**B**) coronary sinus relative to the artery ( $\log_2 C_{FV}$  or  $C_{CS}/C_A$ ) vs. corrected p-value. Metabolites above the dotted line have a corrected p-value  $< 0.05$ .

Fig. S8A.

CS/A vs. CS/A

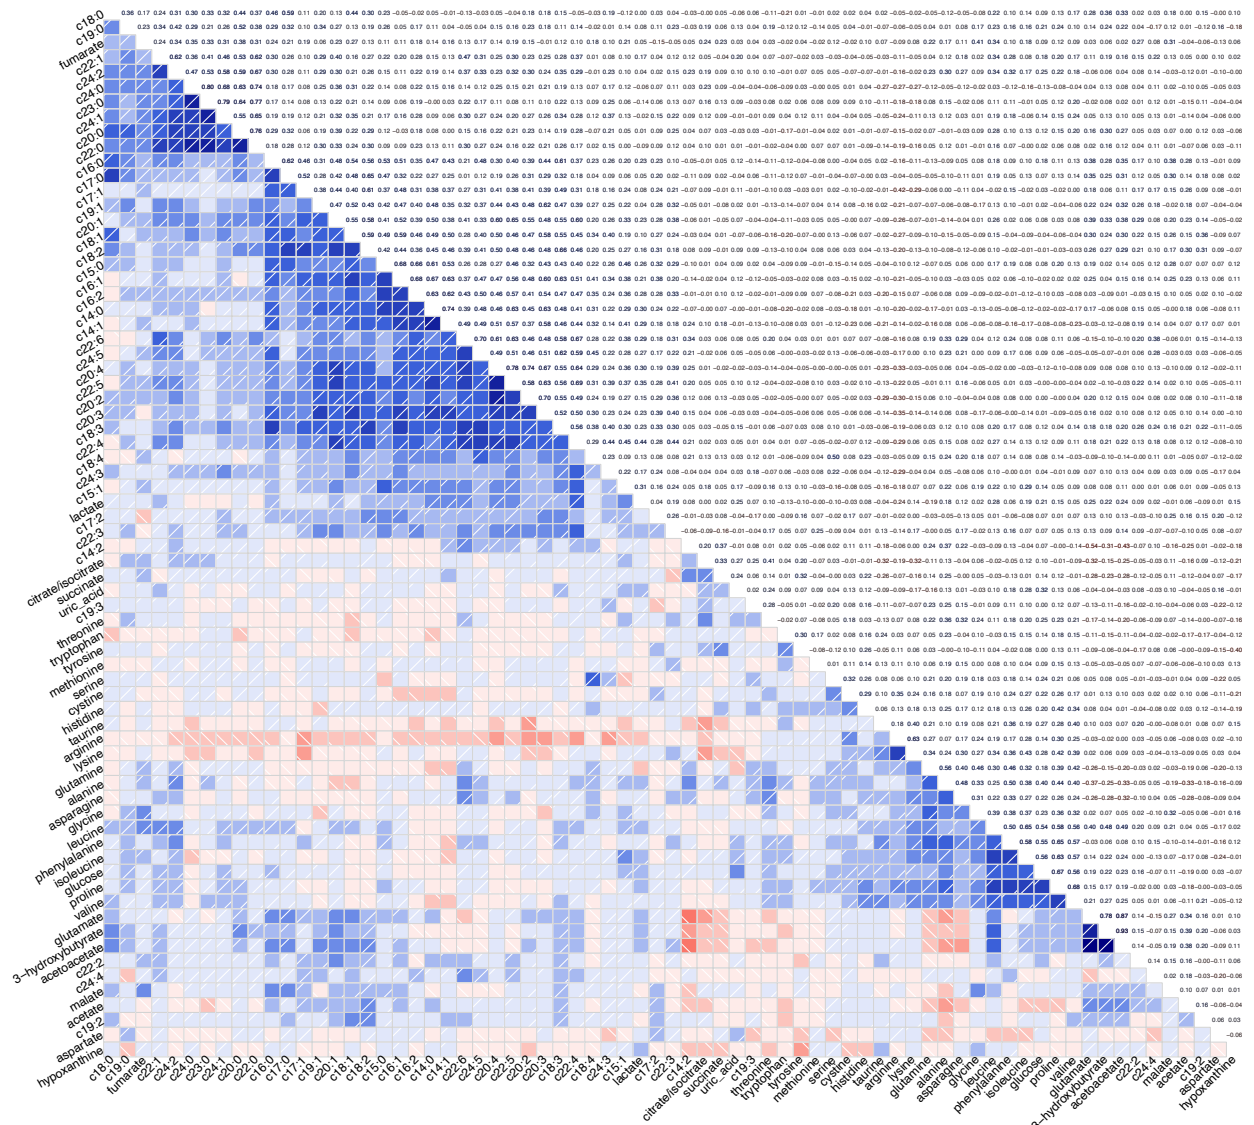

Figure S8A: Comparison of transmyocardial gradients ( $C_{CS}/C_A$ ) of indicated metabolites across all patients by pearson correlation. Metabolites are ordered by hierarchical clustering. See supplemental data (Data S2) for correlation values.

Fig. S8B.

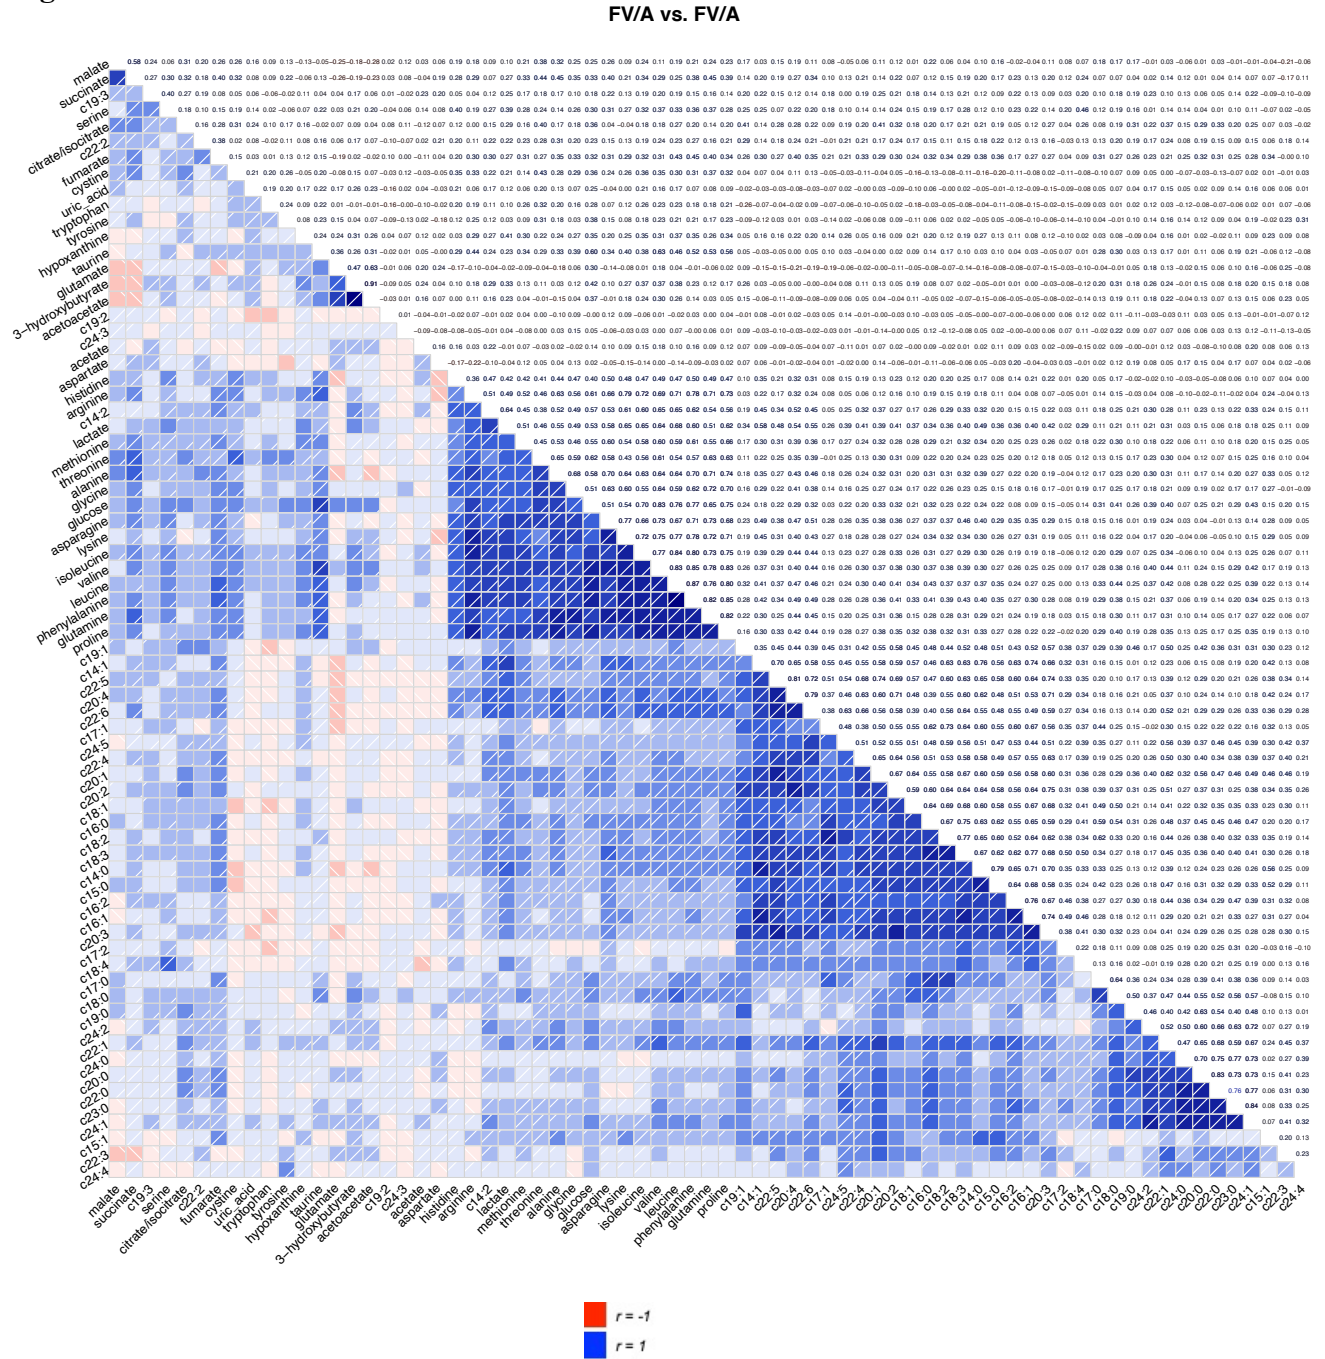

Fig S8B.

Comparison of arteriovenous gradients across the leg ( $C_{FV}/C_A$ ) of indicated metabolites by Pearson correlation. Metabolites are ordered by hierarchical clustering. See supplemental data (Data S2) for correlation values.

Fig. S9.

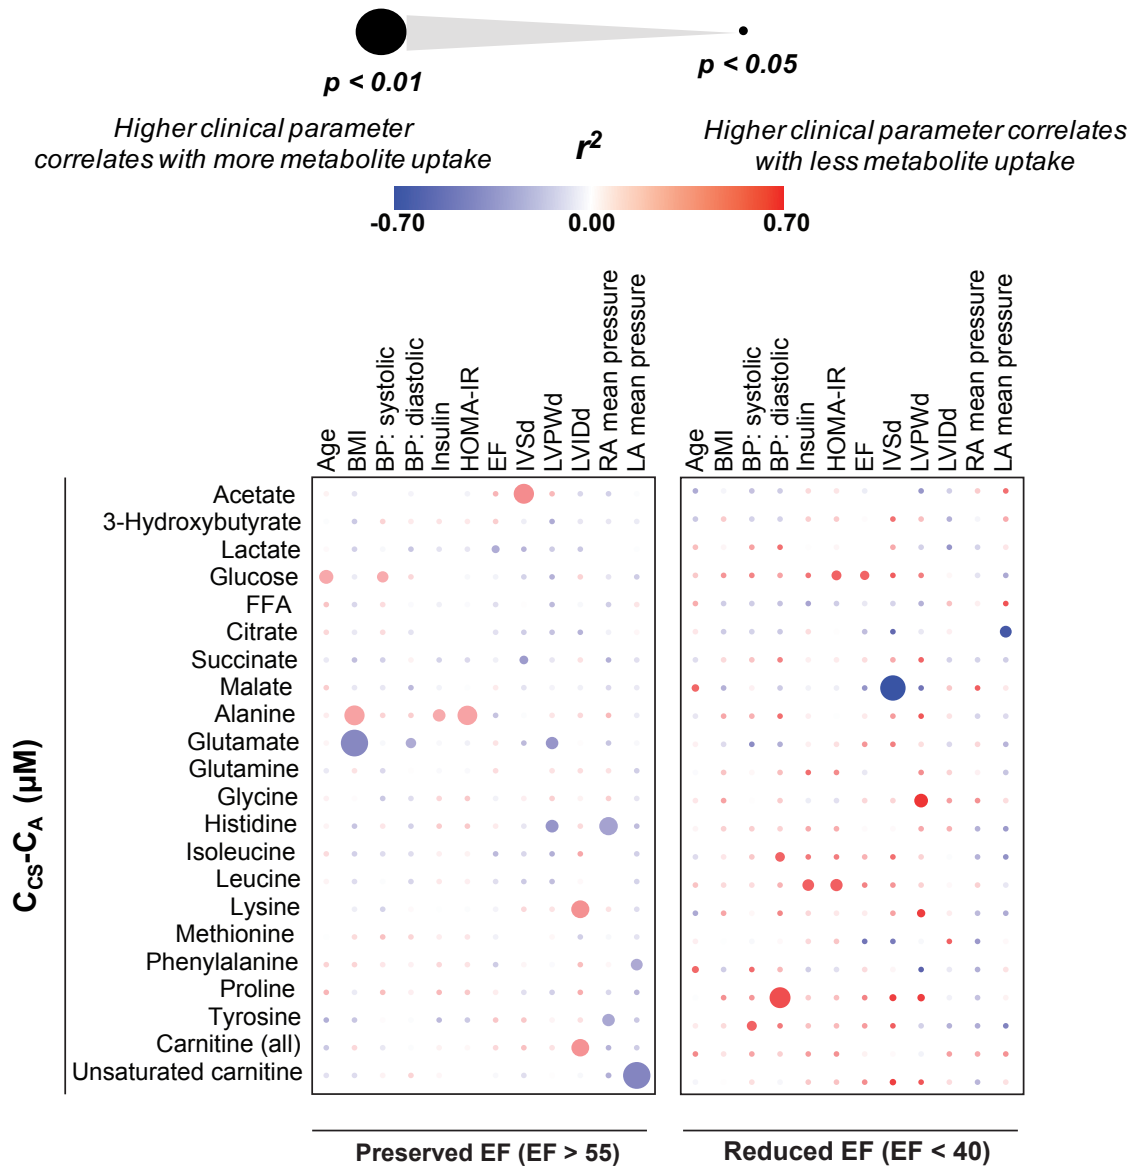

**Fig. S9. Relationship between metabolite uptake or release with indicated clinical parameters in pEF and rEF.** Shade indicates value of pearson correlation coefficient and size of circle indicates p value (Pearson correlation). Negative (blue) coefficients indicate that a higher clinical parameter value correlates with more metabolite uptake. No p values fell below a Bonferroni-adjusted p value of 0.0002.

**Abbreviations:** BMI, body mass index; BP, blood pressure; HOMA IR, homeostatic model of insulin resistance; LVEF, left ventricular ejection fraction; IVSd, interventricular septal diameter, diastole; LVIDd, left ventricular internal dimension at end-diastole LVPWd, left ventricular posterior wall thickness at end-diastole; LA pressure, left atrial pressure (mean); RA pressure, right atrial pressure (mean).



Fig. S10.

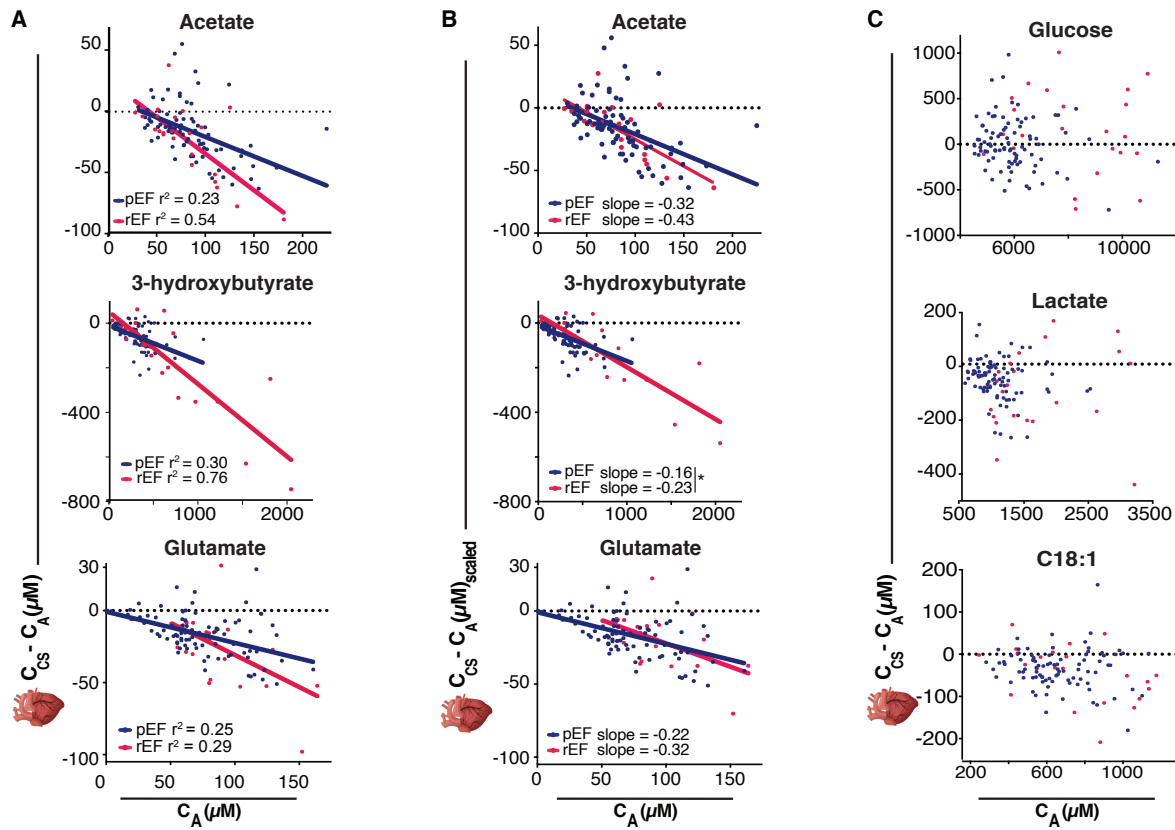

**Fig. S10. Total cardiac uptake of acetate, ketones, and glutamate primarily depends upon circulating concentrations in pEF and rEF. (A-B)** Arterial concentration ( $C_A$ ) vs. uptake of select metabolites by the heart ( $C_{CS} - C_A$ ) before (A) and after (B) adjustment of metabolite uptake to acetate extraction ( $[C_{CS} - C_A]_{\text{scaled}}$ , see Methods for details). \* $p < 0.05$  by ANCOVA (C) Arterial concentration ( $C_A$ ) vs. uptake of select metabolites by the heart ( $C_{CS} - C_A$ ).

**Table S1.**

| <b>Study Population</b>                       |                        |                      |
|-----------------------------------------------|------------------------|----------------------|
|                                               | preserved EF<br>n = 87 | reduced EF<br>n = 23 |
| <b>Age – yr, (SD)</b>                         | 63.95 (12.32)          | 67.35 (9.78)         |
| <b>Female sex – no. (%)</b>                   | 34 (39)                | 3 (13)               |
| <b>BMI – kg/m<sup>2</sup></b>                 | 29.96 (5.85)           | 29.59 (5.98)         |
| <b>Systolic blood pressure -- mmHg</b>        | 134.30 (21.42)         | 124.22 (19.73)       |
| <b>Diastolic blood pressure -- mmHg</b>       | 81.67 (12.75)          | 78.78 (11.71)        |
| <b>Resting heart rate -- bpm</b>              | 79.28 (24.07)          | 81.96 (23.03)        |
| <b>Hypertension treatment – no. (%)</b>       | 39 (44.8)              | 14 (60.9)            |
| <b>Diabetes mellitus treatment -- no. (%)</b> | 11 (12.6)              | 6 (26.1)             |
| <b>Treatment for hyperlipidemia – no. (%)</b> | 36 (40.9)              | 15 (65.2)            |
| <b>Prior PCI – no. (%)</b>                    | 4 (4.59)               | 4 (17.4%)            |
| <b>Prior CABG– no. (%)</b>                    | 3 (3.45)               | 6 (26.1%)            |
| <b>Ischemic Cardiomyopathy – no. (%)</b>      | 0                      | 15 (65.2)            |
| <b>Non-Ischemic Cardiomyopathy -- no. (%)</b> | 0                      | 8 (34.8)             |
| <b>Procedure Type</b>                         |                        |                      |
| <b>Ablation of atrial fibrillation</b>        | 87                     | 20                   |
| <b>Ablation of ventricular tachycardia</b>    | 0                      | 3                    |
| <b>Laboratory Values</b>                      |                        |                      |
| <b>Fasting glucose – mg/dL</b>                | 106.59 (19.49)         | 106.09 (16.30)       |
| <b>HOMA-IR – (microU * nmol)/dL</b>           | 2.61 (3.45)            | 2.45 (1.95)          |
| <b>Atrial Chamber Pressure</b>                |                        |                      |
| <b>Right atrial mean pressure -- mmHg</b>     | 10.24 (4.25)           | 10.63 (4.15)         |
| <b>Left atrial mean pressure -- mmHg</b>      | 14.68 (7.78)           | 17.25 (5.26)         |
| <b>Echocardiographic Parameters</b>           |                        |                      |
| <b>LVEF -- %</b>                              | 58.29 (5.08)           | 28.69 (9.39)         |
| <b>IVSd -- cm</b>                             | 1.06 (0.20)            | 1.00 (0.23)          |
| <b>LVPWd -- cm</b>                            | 1.02 (0.19)            | 1.01 (0.23)          |
| <b>LVIDd -- cm</b>                            | 4.72 (0.63)            | 6.18 (0.91)          |

**Table S1.** Demographic characteristics and clinical parameters of study population.

**Abbreviations:** LVEF, left ventricular ejection fraction; IVSd, interventricular septal diameter, diastole; LVPWd, left ventricular posterior wall thickness at end-diastole; LVIDd, left ventricular internal dimension at end-diastole.

Data are presented as average (S.D.) unless otherwise noted.

**Table S2.** Comparison of present study against past arteriovenous metabolomic profiling using the human arm.

| Metabolite    | Ivanisevic et al. 2015 |        | Current study |            |
|---------------|------------------------|--------|---------------|------------|
|               | $C_V/C_A$              | $p^*$  | $C_{FV}/C_A$  | $p^*$      |
| Alanine       | 1.17 ± 0.04            | 0.0003 | 1.216 ± 0.014 | 1.02 e-13  |
| Serine        | 0.93 ± 0.03            | 0.0144 | 0.968 ± 0.015 | 1.44 e-4   |
| Malate        | 1.76 ± 0.23            | 0.0012 | 1.108 ± 0.033 | 7.17 e-4   |
| Phenylalanine | 1.09 ± 0.02            | 0.0033 | 1.075 ± 0.009 | 1.369 e-11 |
| Glutamine     | 1.17 ± 0.06            | 0.0259 | 1.090 ± 0.009 | 1.41 e-12  |
| Lactate       | 1.31 ± 0.06            | 0.0001 | 1.128 ± 0.011 | 1.41 e-12  |
| Glutamate     | 0.33 ± 0.32            | 0.0001 | 0.321 ± 0.011 | 4.30 e-14  |
| Succinate     | 1.56 ± 0.09            | 0.0001 | 1.191 ± 0.014 | 8.93 e-13  |
| Leucine       | 0.97 ± 0.03            | ns     | 1.035 ± 0.009 | 3.52 e-4   |
| Isoleucine    | 0.97 ± 0.03            | ns     | 1.028 ± 0.010 | 1.43 e-3   |
| Methionine    | 1.05 ± 0.06            | ns     | 1.141 ± 0.016 | 1.55 e-12  |
| Proline       | 1.02 ± 0.03            | ns     | 1.069 ± 0.009 | 9.48 e-11  |
| Glycine       | 1.04 ± 0.02            | ns     | 1.107 ± 0.012 | 1.68 e-10  |
| Threonine     | 1.02 ± 0.03            | ns     | 1.098 ± 0.015 | 6.31 e-8   |
| Asparagine    | 1.03 ± 0.03            | ns     | 1.111 ± 0.014 | 2.73 e-10  |
| Histidine     | 1.02 ± 0.03            | ns     | 1.059 ± 0.014 | 9.92 e-5   |
| Arginine      | 1.06 ± 0.05            | ns     | 1.094 ± 0.012 | 1.80 e-11  |
| Lysine        | 1.04 ± 0.04            | ns     | 1.068 ± 0.010 | 5.40 e-12  |
| C22:6         | 1.10 ± 0.09            | ns     | 1.141 ± 0.013 | 8.29 e-13  |
| C20:4         | 1.06 ± 0.07            | ns     | 1.122 ± 0.012 | 5.01 e-12  |
| Hypoxanthine  | 1.77 ± 0.39            | ns     | 0.848 ± 0.021 | 2.16 e-8   |
| Hippuric acid | 1.03 ± 0.04            | ns     | 0.803 ± 0.018 | 1.17 e-11  |

**Table S3.** Uptake and release of highly abundant circulating metabolites by the heart and leg in pEF patient population. Red indicates metabolite uptake; blue indicates release.  $p$  value calculated by 1-sample Wilcoxon test.  $p^*$  indicates Benjamini-Hochberg adjusted value.

| Metabolite        | Leg (pEF)      |           |           | Heart (pEF)    |           |           |
|-------------------|----------------|-----------|-----------|----------------|-----------|-----------|
|                   | $C_{FV} / C_A$ | $p$       | $p^*$     | $C_{CS} / C_A$ | $p$       | $p^*$     |
| Glucose           | 0.960 ± 0.008  | 2.53 e-9  | 1.69 e-8  | 1.003 ± 0.005  | 0.955     | 0.985     |
| Lactate           | 1.128 ± 0.01   | 7.88 e-14 | 1.41 e-12 | 0.946 ± 0.008  | 8.52 e-10 | 1.70 e-8  |
| 3-hydroxybutyrate | 0.598 ± 0.017  | 5.75 e-16 | 4.30 e-14 | 0.789 ± 0.015  | 6.07 e-15 | 7.90 e-13 |
| Acetoacetate      | 0.499 ± 0.013  | 5.56 e-16 | 4.30 e-14 | 0.780 ± 0.016  | 2.45 e-14 | 1.59 e-12 |
| Acetate           | 0.730 ± 0.026  | 1.85 e-11 | 1.60 e-10 | 0.833 ± 0.027  | 5.78 e-8  | 7.88 e-7  |
| C16:0             | 1.014 ± 0.010  | 0.49      | 0.598     | 0.962 ± 0.009  | 7.23 e-6  | 6.47 e-5  |
| C18:0             | 0.951 ± 0.011  | 2.84 e-8  | 1.57 e-7  | 0.983 ± 0.010  | 0.029     | 0.088     |
| C18:1             | 1.026 ± 0.010  | 0.04      | 0.089     | 0.936 ± 0.008  | 1.58 e-10 | 3.43 e-9  |
| C18:2             | 1.052 ± 0.011  | 6.24 e-6  | 2.42 e-5  | 0.939 ± 0.008  | 5.83 e-9  | 1.08 e-7  |
| C18:3             | 1.070 ± 0.012  | 4.71 e-8  | 2.55 e-7  | 0.953 ± 0.007  | 7.35 e-8  | 9.10 e-7  |
| C20:3             | 1.064 ± 0.013  | 5.53 e-6  | 2.21 e-5  | 0.965 ± 0.009  | 8.96 e-5  | 6.29 e-4  |
| C20:4             | 1.122 ± 0.012  | 3.85 e-13 | 5.01 e-12 | 0.954 ± 0.009  | 9.84 e-7  | 9.84 e-6  |
| C22:6             | 1.141 ± 0.013  | 3.51 e-14 | 8.29 e-13 | 0.972 ± 0.009  | 0.002     | 0.012     |
| Leucine           | 1.035 ± 0.009  | 0.0001    | 3.52 e-4  | 0.984 ± 0.005  | 7.85 e-5  | 5.48 e-4  |
| Isoleucine        | 1.028 ± 0.010  | 0.0004    | 1.43 e-3  | 0.990 ± 0.005  | 0.01      | 0.041     |
| Valine            | 1.009 ± 0.008  | 0.27      | 0.366     | 0.995 ± 0.005  | 0.45      | 0.669     |
| Phenylalanine     | 1.075 ± 0.009  | 1.21 e-12 | 1.37 e-11 | 1.007 ± 0.004  | 0.081     | 0.207     |
| Histidine         | 1.059 ± 0.014  | 2.90 e-5  | 9.922 e-5 | 1.030 ± 0.011  | 0.018     | 0.062     |
| Lysine            | 1.068 ± 0.010  | 6.46 e-11 | 5.40 e-12 | 1.012 ± 0.008  | 0.24      | 0.449     |
| Threonine         | 1.098 ± 0.015  | 1.09 e-8  | 6.31 e-8  | 0.999 ± 0.009  | 0.98      | 0.99      |
| Methionine        | 1.141 ± 0.016  | 9.56 e-14 | 1.55 e-12 | 1.023 ± 0.012  | 0.046     | 0.128     |
| Alanine           | 1.216 ± 0.014  | 2.36 e-15 | 1.02 e-13 | 1.042 ± 0.006  | 2.58 e-8  | 3.95 e-7  |
| Glycine           | 1.107 ± 0.012  | 2.00 e-11 | 1.68 e-10 | 1.016 ± 0.010  | 0.17      | 0.376     |
| Proline           | 1.069 ± 0.009  | 1.02 e-11 | 9.48 e-11 | 1.011 ± 0.005  | 0.007     | 0.032     |
| Tyrosine          | 1.024 ± 0.028  | 0.36      | 0.469     | 1.002 ± 0.021  | 0.744     | 0.886     |
| Aspartate         | 0.990 ± 0.020  | 0.18      | 0.270     | 1.010 ± 0.016  | 0.563     | 0.744     |
| Glutamate         | 0.321 ± 0.011  | 5.56 e-16 | 4.30 e-14 | 0.770 ± 0.019  | 1.87 e-13 | 9.71 e-12 |
| Arginine          | 1.094 ± 0.012  | 2.90 e-10 | 1.80 e-11 | 1.019 ± 0.011  | 0.20      | 0.101     |
| Serine            | 0.968 ± 0.015  | 8.57 e-6  | 1.55 e-4  | 1.02 ± 0.015   | 0.27      | 0.323     |
| Asparagine        | 1.111 ± 0.014  | 3.36 e-11 | 2.73 e-10 | 1.019 ± 0.008  | 0.03      | 0.089     |
| Glutamine         | 1.090 ± 0.009  | 8.14 e-14 | 1.41 e-12 | 1.032 ± 0.006  | 6.06 e-8  | 7.88 e-7  |

**Table S4.** Uptake and release of additional free fatty acids and acylcarnitines by the heart and leg in the pEF population. Red indicates metabolite uptake; blue indicates release. *p* value calculated by 1-sample Wilcoxon test. *p*\* indicates Benjamini-Hochberg adjusted value.

| Metabolite      | Leg (pEF)      |           |            | Heart (pEF)    |           |            |
|-----------------|----------------|-----------|------------|----------------|-----------|------------|
|                 | $C_{FV} / C_A$ | <i>p</i>  | <i>p</i> * | $C_{CS} / C_A$ | <i>p</i>  | <i>p</i> * |
| C14:0           | 1.157 ± 0.014  | 4.06 e-15 | 1.27 e-15  | 0.950 ± 0.010  | 6.73 e-07 | 6.97 e-06  |
| C14:1           | 1.316 ± 0.017  | 6.61 e-16 | 4.29 e-16  | 0.963 ± 0.010  | 2.94 e-4  | 0.002      |
| C14:2           | 1.119 ± 0.014  | 9.06 e-11 | 6.90 e-10  | 1.13 ± 0.013   | 1.45 e-11 | 3.76 e-10  |
| C15:0           | 1.103 ± 0.015  | 1.87 e-10 | 1.34 e-09  | 0.996 ± 0.011  | 0.206     | 0.413      |
| C15:1           | 1.162 ± 0.019  | 1.20 e-10 | 8.87 e-10  | 0.931 ± 0.014  | 2.62 e-07 | 2.83 e-06  |
| C16:1           | 1.173 ± 0.0149 | 3.66 e-15 | 1.31 e-13  | 0.943 ± 0.009  | 8.50 e-09 | 1.38 e-07  |
| C16:2           | 1.153 ± 0.016  | 1.14 e-12 | 3.02 e-13  | 0.958 ± 0.012  | 4.9 e-4   | 2.9 e-3    |
| C17:0           | 1.019 ± 0.012  | 0.89      | 0.92       | 1.003 ± 0.011  | 0.76      | 0.89       |
| C17:1           | 1.083 ± 0.013  | 5.23 e-07 | 2.51 e-06  | 0.951 ± 0.0114 | 2.7 e-4   | 0.0017     |
| C17:2           | 1.076 ± 0.016  | 8.96 e-05 | 2.87 e-4   | 0.942 ± 0.0144 | 2.47 e-05 | 1.99 e-4   |
| C18:3           | 1.078 ± 0.011  | 4.71 e-08 | 2.54 e-07  | 0.956 ± 0.007  | 7.35 e-08 | 9.06 e-07  |
| C18:4           | 1.140 ± 0.023  | 1.48 e-07 | 7.69 e-07  | 1.022 ± 0.017  | 0.52      | 0.71       |
| C20:0           | 0.940 ± 0.013  | 1.34 e-09 | 9.11 e-09  | 0.959 ± 0.013  | 1.21 e-07 | 1.42 e-06  |
| C20:1           | 0.989 ± 0.011  | 0.0091    | 0.02       | 0.914 ± 0.009  | 7.83 e-12 | 2.39 e-10  |
| C20:2           | 1.033 ± 0.011  | 0.024     | 0.049      | 0.959 ± 0.008  | 1.87 e-06 | 1.80 e-05  |
| C22:0           | 0.963 ± 0.02   | 2.71 e-05 | 9.36 e-05  | 0.962 ± 0.017  | 7.46 e-06 | 6.44 e-05  |
| C22:1           | 0.952 ± 0.013  | 1.40 e-05 | 5.16 e-05  | 0.937 ± 0.013  | 6.45 e-09 | 1.11 e-07  |
| C22:2           | 0.984 ± 0.03   | 0.0030    | 0.0076     | 0.973 ± 0.024  | 0.0049    | 0.022      |
| C22:4           | 1.077 ± 0.012  | 5.47 e-07 | 2.58 e-06  | 0.939 ± 0.010  | 3.89 e-08 | 5.60 e-07  |
| C22:5           | 1.121 ± 0.013  | 4.72 e-12 | 4.71 e-11  | 0.966 ± 0.011  | 5.40 e-4  | 0.0030     |
| carnitine C2    | 0.949 ± 0.009  | 3.68 e-09 | 2.27 e-08  | 0.994 ± 0.006  | 0.35      | 0.57       |
| carnitine C3    | 0.991 ± 0.015  | 0.043     | 0.085      | 1.012 ± 0.016  | 0.53      | 0.71       |
| carnitine C4    | 0.994 ± 0.012  | 0.029     | 0.059      | 1.014 ± 0.012  | 0.38      | 0.59       |
| carnitine C5:0  | 1.051 ± 0.016  | 3.58 e-05 | 1.20 e-4   | 0.988 ± 0.010  | 0.51      | 0.71       |
| carnitine C6:0  | 0.847 ± 0.013  | 1.32 e-13 | 1.89 e-12  | 0.983 ± 0.012  | 0.017     | 0.060      |
| carnitine C8:0  | 1.127 ± 0.016  | 9.07 e-12 | 8.70 e-11  | 1.032 ± 0.012  | 0.0032    | 0.015      |
| carnitine C8:1  | 0.843 ± 0.015  | 1.78 e-11 | 1.59 e-10  | 1.011 ± 0.012  | 0.89      | 0.95       |
| carnitine C10:0 | 1.134 ± 0.014  | 1.49 e-13 | 2.04 e-12  | 1.028 ± 0.011  | 0.0054    | 0.024      |
| carnitine C10:1 | 1.079 ± 0.015  | 2.07 e-06 | 8.78 e-06  | 1.034 ± 0.011  | 0.012     | 0.048      |
| carnitine C10:2 | 1.047 ± 0.016  | 0.0039    | 0.0097     | 1.031 ± 0.014  | 0.020     | 0.066      |
| carnitine C10:3 | 1.040 ± 0.021  | 0.021     | 0.045      | 1.074 ± 0.036  | 0.0024    | 0.012      |
| carnitine C14:0 | 0.956 ± 0.023  | 0.0098    | 0.022      | 1.006 ± 0.023  | 0.89      | 0.95       |
| carnitine C14:1 | 0.964 ± 0.017  | 9.85 e-4  | 0.003      | 0.983 ± 0.018  | 0.11      | 0.26       |
| carnitine C14:2 | 0.945 ± 0.013  | 1.94 e-6  | 8.38 e-6   | 0.985 ± 0.011  | 0.26      | 0.46       |
| carnitine C16:0 | 0.966 ± 0.023  | 0.009     | 0.021      | 1.028 ± 0.028  | 0.65      | 0.82       |
| carnitine C16:2 | 0.961 ± 0.031  | 0.063     | 0.12       | 1.001 ± 0.027  | 0.57      | 0.75       |
| carnitine C18:0 | 0.988 ± 0.019  | 0.021     | 0.044      | 1.017 ± 0.021  | 0.86      | 0.94       |
| carnitine C18:1 | 0.973 ± 0.013  | 0.003     | 0.006      | 0.985 ± 0.008  | 0.16      | 0.36       |
| carnitine C18:2 | 0.996 ± 0.018  | 0.39      | 0.49       | 1.017 ± 0.014  | 0.54      | 0.73       |

**Table S5.** Measured concentrations in arterial plasma of indicated metabolites. Data are average concentration ( $\mu\text{M}$ )  $\pm$  standard error in the artery ( $C_A$ ). P-values are the result of a Mann-Whitney rank sum test. Those p-values listed in red fall below a Bonferroni-adjusted critical value of  $1.667 \text{ e-}3$ .

|                   | $C_A$ ( $\mu\text{M}$ ) |                      | $p$               |
|-------------------|-------------------------|----------------------|-------------------|
|                   | Preserved EF            | Reduced EF           |                   |
| Glucose           | 6057.47 $\pm$ 133.89    | 8208.77 $\pm$ 394.53 | <b>1.0374 e-5</b> |
| Lactate           | 1132.06 $\pm$ 34.86     | 1555.57 $\pm$ 145.96 | <b>1.179 e-3</b>  |
| 3-hydroxybutyrate | 305.22 $\pm$ 20.71      | 655.03 $\pm$ 114.26  | <b>5.141 e-3</b>  |
| Acetate           | 83.62 $\pm$ 3.65        | 79.68 $\pm$ 7.51     | <b>0.593</b>      |
| C16:0             | 365.57 $\pm$ 10.77      | 402.83 $\pm$ 27.15   | <b>0.0980</b>     |
| C18:0             | 93.36 $\pm$ 3.46        | 93.67 $\pm$ 3.05     | <b>0.989</b>      |
| C18:1             | 572.08 $\pm$ 17.12      | 634.85 $\pm$ 47.71   | <b>0.225</b>      |
| C18:2             | 590.58 $\pm$ 15.07      | 523.32 $\pm$ 44.48   | <b>0.165</b>      |
| C20:4             | 10.22 $\pm$ 0.38        | 11.68 $\pm$ 0.99     | <b>0.177</b>      |
| C22:6             | 8.81 $\pm$ 0.51         | 8.08 $\pm$ 1.45      | <b>0.637</b>      |
| Glutamine         | 553.27 $\pm$ 8.34       | 791.74 $\pm$ 45.40   | <b>2.902 e-5</b>  |
| Leucine           | 155.25 $\pm$ 4.07       | 178.92 $\pm$ 7.13    | <b>3.846 e-3</b>  |
| Isoleucine        | 78.45 $\pm$ 2.06        | 90.42 $\pm$ 3.60     | <b>3.846 e-3</b>  |
| Glutamate         | 70.41 $\pm$ 3.81        | 88.66 $\pm$ 6.42     | <b>1.916 e-2</b>  |
| Histidine         | 115.91 $\pm$ 2.64       | 127.85 $\pm$ 4.64    | <b>2.973 e-2</b>  |
| Phenylalanine     | 73.80 $\pm$ 1.97        | 81.46 $\pm$ 3.35     | <b>4.931 e-2</b>  |
| Threonine         | 116.75 $\pm$ 3.20       | 104.03 $\pm$ 5.97    | <b>6.204 e-2</b>  |
| Valine            | 250.34 $\pm$ 5.81       | 270.44 $\pm$ 10.81   | <b>8.639 e-2</b>  |
| Alanine           | 252.47 $\pm$ 8.78       | 282.41 $\pm$ 14.50   | <b>8.909 e-2</b>  |
| Asparagine        | 47.26 $\pm$ 1.17        | 52.98 $\pm$ 3.32     | <b>0.115</b>      |
| Arginine          | 130.03 $\pm$ 6.72       | 114.05 $\pm$ 10.19   | <b>0.168</b>      |
| Proline           | 141.79 $\pm$ 3.93       | 131.23 $\pm$ 9.17    | <b>0.289</b>      |
| Tryptophan        | 49.65 $\pm$ 1.42        | 46.41 $\pm$ 3.30     | <b>0.298</b>      |
| Tyrosine          | 73.03 $\pm$ 2.57        | 78.04 $\pm$ 4.83     | <b>0.364</b>      |
| Serine            | 63.36 $\pm$ 1.59        | 66.07 $\pm$ 3.39     | <b>0.491</b>      |
| Lysine            | 215.31 $\pm$ 5.69       | 225.02 $\pm$ 13.25   | <b>0.542</b>      |
| Taurine           | 43.85 $\pm$ 1.17        | 43.61 $\pm$ 1.45     | <b>0.980</b>      |
| Hypoxanthine      | 12.47 $\pm$ 1.01        | 16.97 $\pm$ 6.40     | <b>0.434</b>      |
| Uric Acid         | 301.94 $\pm$ 12.34      | 361.67 $\pm$ 29.41   | <b>0.145</b>      |

**Table S6.** Uptake and release of indicated metabolites by the heart. Data are average measured uptake or release ( $\mu\text{M}$ )  $\pm$  standard error of indicated metabolites by the heart in patients with preserved or reduced ejection fraction (EF). Average flux in nmol/min/g was calculated assuming a coronary blood flow of 0.8 ml/min/g. P-values are the result of a 1-sample Wilcoxon rank-sum test where  $\mu_0 |C_{CS}-C_A| = 0$ .

|                   | $C_{CS} - C_A$                      |            |                   |                                       |            |                   |
|-------------------|-------------------------------------|------------|-------------------|---------------------------------------|------------|-------------------|
|                   | Preserved EF                        |            |                   | Reduced EF                            |            |                   |
|                   | $\mu\text{M}$                       | nmol/min/g | $p$               | $\mu\text{M}$                         | nmol/min/g | $p$               |
| Glucose           | 10.49 $\pm$ 29.89                   | 8.39       | 0.9829            | 145.24 $\pm$ 94.42                    | 116.19     | 0.14              |
| Lactate           | <b>-54.05 <math>\pm</math> 7.97</b> | -43.24     | <b>&lt;0.0001</b> | <b>-94.94 <math>\pm</math> 30.54</b>  | -75.95     | <b>0.006</b>      |
| 3-hydroxybutyrate | <b>-61.31 <math>\pm</math> 5.84</b> | -49.05     | <b>&lt;0.0001</b> | <b>-163.61 <math>\pm</math> 43.61</b> | -130.89    | <b>0.0002</b>     |
| Acetate           | <b>-15.34 <math>\pm</math> 3.25</b> | -12.27     | <b>&lt;0.0001</b> | <b>-22.83 <math>\pm</math> 6.16</b>   | -18.26     | <b>0.0002</b>     |
| C16:0             | <b>-14.33 <math>\pm</math> 3.53</b> | -11.46     | <b>&lt;0.0001</b> | -12.05 $\pm$ 11.42                    | -9.64      | 0.08              |
| C18:0             | <b>-1.65 <math>\pm</math> 1.05</b>  | -1.32      | <b>0.01</b>       | 3.82 $\pm$ 2.43                       | 3.06       | 0.48              |
| C18:1             | <b>-33.81 <math>\pm</math> 5.02</b> | -27.05     | <b>&lt;0.0001</b> | <b>-44.20 <math>\pm</math> 13.76</b>  | -35.36     | <b>0.004</b>      |
| C18:2             | <b>-33.52 <math>\pm</math> 4.95</b> | -26.82     | <b>&lt;0.0001</b> | <b>-22.09 <math>\pm</math> 10.08</b>  | -17.67     | <b>0.02</b>       |
| C20:4             | <b>-0.46 <math>\pm</math> 0.09</b>  | -0.37      | <b>&lt;0.0001</b> | -0.10 $\pm$ 0.23                      | -0.08      | 0.39              |
| C22:6             | <b>-0.20 <math>\pm</math> 0.08</b>  | -0.16      | <b>0.006</b>      | 0.44 $\pm$ 0.23                       | 0.35       | 0.22              |
| Hypoxanthine      | <b>-3.30 <math>\pm</math> 0.27</b>  | -2.64      | <b>&lt;0.0001</b> | <b>-2.92 <math>\pm</math> 1.20</b>    | -2.34      | <b>0.01</b>       |
| Uric Acid         | 10.19 $\pm$ 0.42                    | 8.15       | 0.90              | 130.80 $\pm$ 75.97                    | 104.64     | 0.94              |
| Glutamine         | <b>17.61 <math>\pm</math> 3.18</b>  | 14.09      | <b>&lt;0.0001</b> | <b>34.04 <math>\pm</math> 12.57</b>   | 27.23      | <b>0.004</b>      |
| Glutamate         | <b>-16.08 <math>\pm</math> 1.64</b> | -12.86     | <b>&lt;0.0001</b> | <b>-25.84 <math>\pm</math> 5.32</b>   | -20.67     | <b>&lt;0.0001</b> |
| Phenylalanine     | 0.72 $\pm$ 0.35                     | 0.58       | 0.17              | 1.83 $\pm$ 1.00                       | 1.46       | 0.13              |
| Threonine         | 0.22 $\pm$ 1.02                     | 0.18       | 0.92              | 4.58 $\pm$ 2.31                       | 3.66       | 0.07              |
| Histidine         | <b>4.34 <math>\pm</math> 1.29</b>   | 3.47       | <b>0.02</b>       | <b>5.53 <math>\pm</math> 4.39</b>     | 4.42       | <b>0.04</b>       |
| Lysine            | 3.32 $\pm$ 1.93                     | 2.66       | 0.27              | <b>7.40 <math>\pm</math> 5.58</b>     | 5.92       | <b>0.01</b>       |
| Arginine          | 2.64 $\pm$ 1.62                     | 2.11       | 0.14              | <b>3.23 <math>\pm</math> 3.39</b>     | 2.58       | <b>0.01</b>       |
| Isoleucine        | <b>-0.68 <math>\pm</math> 0.34</b>  | -0.54      | <b>0.009</b>      | 0.27 $\pm$ 1.31                       | 0.22       | 0.89              |
| Leucine           | <b>-2.36 <math>\pm</math> 0.76</b>  | -1.89      | <b>&lt;0.0001</b> | -0.01 $\pm$ 2.10                      | -0.01      | 0.87              |
| Tryptophan        | <b>2.87 <math>\pm</math> 3.27</b>   | 2.30       | 0.01              | <b>-0.41 <math>\pm</math> 4.38</b>    | -0.33      | <b>0.03</b>       |
| Valine            | -0.44 $\pm$ 1.13                    | -0.35      | 0.43              | 7.60 $\pm$ 3.86                       | 6.08       | 0.11              |
| Proline           | <b>2.04 <math>\pm</math> 0.70</b>   | 1.63       | <b>0.005</b>      | <b>2.81 <math>\pm</math> 1.89</b>     | 2.25       | <b>0.04</b>       |
| Tyrosine          | -0.22 $\pm$ 1.53                    | -0.18      | 0.66              | -5.10 $\pm$ 3.63                      | -4.08      | 0.19              |
| Alanine           | <b>11.49 <math>\pm</math> 1.86</b>  | 9.19       | <b>&lt;0.0001</b> | <b>15.33 <math>\pm</math> 6.33</b>    | 12.26      | 0.02              |
| Asparagine        | <b>0.93 <math>\pm</math> 0.41</b>   | 0.74       | <b>0.04</b>       | <b>2.71 <math>\pm</math> 1.12</b>     | 2.17       | <b>0.02</b>       |
| Serine            | 1.66 $\pm$ 1.21                     | 1.33       | 0.29              | 0.84 $\pm$ 1.44                       | 0.67       | 0.54              |
| Taurine           | <b>0.86 <math>\pm</math> 0.38</b>   | 0.69       | <b>0.01</b>       | 0.96 $\pm$ 0.91                       | 0.77       | 0.41              |

**Table S7. Uptake and release of indicated metabolites by the leg.** Data are average measured uptake or release ( $\mu\text{M}$ )  $\pm$  standard error of indicated metabolites by the leg in patients with preserved or reduced ejection fraction (EF). Average flux in  $\text{nmol}/\text{min}/\text{g}$  was calculated assuming average blood flow of  $0.035 \text{ ml}/\text{min}/\text{g}$  in the leg.  $p$  values are the result of a 1-sample Wilcoxon rank-sum test where  $\mu_0 |C_{\text{FV}} - C_{\text{A}}| = 0$ .

|                   | $C_{\text{FV}} - C_{\text{A}}$        |                                   |               |                                        |                                     |               |
|-------------------|---------------------------------------|-----------------------------------|---------------|----------------------------------------|-------------------------------------|---------------|
|                   | Preserved EF                          |                                   |               | Reduced EF                             |                                     |               |
|                   | $\mu\text{M}$                         | $\text{nmol}/\text{min}/\text{g}$ | $p$           | $\mu\text{M}$                          | $\mu\text{mol}/\text{min}/\text{g}$ | $p$           |
| Glucose           | <b>-231.94 <math>\pm</math> 50.05</b> | -8.12                             | <0.0001       | <b>-272.66 <math>\pm</math> 132.42</b> | -9.54                               | <b>0.01</b>   |
| Lactate           | 127.20 $\pm$ 13.54                    | 4.45                              | <0.0001       | <b>133.02 <math>\pm</math> 33.47</b>   | 4.66                                | <b>0.0006</b> |
| 3-hydroxybutyrate | <b>-108.77 <math>\pm</math> 6.96</b>  | -3.81                             | <0.0001       | <b>-153.74 <math>\pm</math> 33.75</b>  | -5.38                               | <0.0001       |
| Acetate           | <b>-25.26 <math>\pm</math> 2.90</b>   | -0.88                             | <0.0001       | <b>-30.41 <math>\pm</math> 5.25</b>    | -1.06                               | <0.0001       |
| C16:0             | 5.91 $\pm$ 3.84                       | 0.21                              | 0.80          | 15.66 $\pm$ 13.95                      | 0.55                                | 0.68          |
| C18:0             | <b>-4.22 <math>\pm</math> 0.99</b>    | -0.15                             | <0.0001       | -0.50 $\pm$ 2.65                       | -0.018                              | 0.85          |
| C18:1             | 15.69 $\pm$ 5.43                      | 0.55                              | 0.11          | 18.59 $\pm$ 17.44                      | 0.65                                | 0.39          |
| C18:2             | <b>30.76 <math>\pm</math> 6.38</b>    | 1.08                              | <0.0001       | 12.84 $\pm$ 12.68                      | 0.45                                | 0.17          |
| C20:4             | <b>1.20 <math>\pm</math> 0.13</b>     | 0.042                             | <0.0001       | <b>1.75 <math>\pm</math> 0.34</b>      | 0.061                               | <0.0001       |
| C22:6             | <b>1.19 <math>\pm</math> 0.13</b>     | 0.042                             | <0.0001       | <b>0.76 <math>\pm</math> 0.33</b>      | 0.027                               | <0.0001       |
| Hypoxanthine      | <b>-1.89 <math>\pm</math> 0.15</b>    | -0.066                            | <b>0.0002</b> | -2.93 $\pm$ 1.77                       | -0.10                               | 0.09          |
| Uric Acid         | 4.83 $\pm$ 0.20                       | 0.17                              | 0.36          | 48.11 $\pm$ 49.04                      | 1.68                                | 0.16          |
| Glutamine         | <b>49.84 <math>\pm</math> 4.96</b>    | 1.74                              | <0.0001       | <b>44.71 <math>\pm</math> 13.24</b>    | 1.56                                | <b>0.002</b>  |
| Glutamate         | <b>-47.82 <math>\pm</math> 2.72</b>   | -1.67                             | <0.0001       | <b>-49.84 <math>\pm</math> 6.50</b>    | -1.74                               | <0.0001       |
| Phenylalanine     | <b>5.75 <math>\pm</math> 0.67</b>     | 0.20                              | <0.0001       | <b>4.96 <math>\pm</math> 1.60</b>      | 0.17                                | <b>0.003</b>  |
| Threonine         | <b>11.54 <math>\pm</math> 1.63</b>    | 0.40                              | <0.0001       | <b>15.13 <math>\pm</math> 3.73</b>     | 0.53                                | <b>0.0001</b> |
| Histidine         | <b>7.35 <math>\pm</math> 1.50</b>     | 0.26                              | <0.0001       | 4.37 $\pm$ 2.99                        | 0.15                                | 0.13          |
| Lysine            | <b>15.40 <math>\pm</math> 2.43</b>    | 0.54                              | <0.0001       | <b>16.58 <math>\pm</math> 5.56</b>     | 0.58                                | <b>0.004</b>  |
| Arginine          | <b>11.73 <math>\pm</math> 1.74</b>    | 0.41                              | <0.0001       | <b>11.49 <math>\pm</math> 3.43</b>     | 0.40                                | <b>0.0002</b> |
| Isoleucine        | <b>2.51 <math>\pm</math> 0.79</b>     | 0.088                             | <b>0.0004</b> | 2.89 $\pm$ 2.32                        | 0.10                                | 0.11          |
| Leucine           | <b>5.83 <math>\pm</math> 1.39</b>     | 0.20                              | <b>0.0002</b> | 5.99 $\pm$ 3.49                        | 0.21                                | 0.11          |
| Tryptophan        | 4.76 $\pm$ 3.83                       | 0.17                              | 0.16          | -3.54 $\pm$ 3.55                       | -0.12                               | 0.07          |
| Valine            | 3.45 $\pm$ 2.04                       | 0.12                              | 0.61          | 5.79 $\pm$ 5.17                        | 0.20                                | 0.75          |
| Proline           | <b>10.22 <math>\pm</math> 1.19</b>    | 0.36                              | <0.0001       | <b>8.66 <math>\pm</math> 3.13</b>      | 0.30                                | <b>0.0003</b> |
| Tyrosine          | 1.45 $\pm$ 1.72                       | 0.051                             | 0.33          | -0.74 $\pm$ 4.07                       | -0.026                              | 0.32          |
| Alanine           | <b>57.88 <math>\pm</math> 4.45</b>    | 2.03                              | <0.0001       | <b>50.56 <math>\pm</math> 10.20</b>    | 1.77                                | <0.0001       |
| Asparagine        | <b>5.09 <math>\pm</math> 0.57</b>     | 0.18                              | <0.0001       | <b>6.47 <math>\pm</math> 1.34</b>      | 0.23                                | <0.0001       |
| Serine            | <b>-2.37 <math>\pm</math> 1.15</b>    | -0.083                            | <0.0001       | -2.18 $\pm$ 1.91                       | -0.076                              | 0.23          |
| Taurine           | <b>-0.46 <math>\pm</math> 0.46</b>    | -0.016                            | <b>0.02</b>   | 0.88 $\pm$ 1.25                        | 0.031                               | 0.82          |



**Table S8. Substrate-specific contribution to cardiac ATP generation in patients with pEF or rEF. Corresponds to Fig. 3B. See Methods for details of calculations.**

|                      | Contribution to cardiac ATP generation (%) |            |
|----------------------|--------------------------------------------|------------|
|                      | Preserved EF                               | Reduced EF |
| C18:1                | 14.95                                      | 18.67      |
| C18:2                | 19.19                                      | 9.21       |
| C16:0                | 5.52                                       | 4.55       |
| C18:3                | 1.53                                       | 0.48       |
| C20:3                | 1.25                                       | 0.22       |
| C18:0                | 0.81                                       | -          |
| C20:1                | 0.61                                       | 0.29       |
| C22:5                | 0.55                                       | -          |
| C22:4                | 0.50                                       | 0.14       |
| C16:1                | 0.35                                       | 0.33       |
| C14:0                | 0.31                                       | 0.41       |
| C20:2                | 0.27                                       | 0.10       |
| C20:4                | 0.21                                       | 0.05       |
| C17:1                | 0.18                                       | 0.15       |
| C22:1                | 0.15                                       | 0.02       |
| C22:0                | 0.11                                       | -          |
| C20:0                | 0.10                                       | -          |
| C22:6                | 0.10                                       | -          |
| C15:0                | 0.05                                       | 0.14       |
| C22:2                | 0.03                                       | 0.08       |
| C14:1                | 0.03                                       | 0.03       |
| C22:3                | 0.02                                       | 0.01       |
| C19:0                | 0.02                                       | -          |
| C24:1                | 0.01                                       | -          |
| C19:1                | 0.01                                       | 0.01       |
| C15:1                | 0.002                                      | 0.002      |
| C17:0                | 0.001                                      | 0.003      |
| 3-hydroxybutyrate    | 4.86                                       | 13.12      |
| Acetoacetate         | 1.53                                       | 3.28       |
| Lactate              | 2.79                                       | 5.00       |
| Acetate              | 0.17                                       | 0.24       |
| 2-Ketoisocaproate    | 0.09                                       | 0.19       |
| 2-Ketoisovalerate    | 0.12                                       | 0.16       |
| Carnitine C18:1      | 0.002                                      | -          |
| Glutamate            | 1.10                                       | 1.61       |
| Leucine              | 0.90                                       | 1.09       |
| Isoleucine           | 0.62                                       | 0.96       |
| Valine               | 0.45                                       | 0.01       |
| Lysine               | 0.38                                       | 0.53       |
| Aspartate            | 0.32                                       | 0.62       |
| Threonine            | 0.30                                       | 0.20       |
| Asparagine           | 0.24                                       | 0.36       |
| Proline              | 0.14                                       | 0.42       |
| Arginine             | 0.09                                       | 0.35       |
| Serine               | 0.07                                       |            |
| Methionine           | 0.01                                       | 0.08       |
| LpFA/unaccounted FFA | 44.0                                       | 36.5       |

**Table S9. Uptake and release of indicated metabolites by the heart.** Blue indicates significant release. P-values for  $C_{CS}/C_A$  are the result of a 1-sample Wilcoxon rank-sum test with Benjamini-Hochberg correction (\*). P-values for comparison of pEF vs. rEF were derived from a student's t-test; no p values for this test were below a Bonferroni-adjusted critical value of 0.0002.

|                         | Preserved EF   |              |                 | Reduced EF     |              |                 | Comparison |
|-------------------------|----------------|--------------|-----------------|----------------|--------------|-----------------|------------|
|                         | $C_{CS} / C_A$ | SEM          | $p^*$           | $C_{CS} / C_A$ | SEM          | $p^*$           | $p$        |
| carnitine               | 1.003          | 5.97 e-3     | 0.964           | 1.005          | 0.015        | 0.992           | 0.865      |
| acetyl-carnitine        | 0.993          | 5.63 e-3     | 0.567           | 1.021          | 0.019        | 0.912           | 0.175      |
| propionyl-carnitine     | 1.012          | 0.015        | 0.716           | 1.055          | 0.032        | 0.264           | 0.240      |
| butyryl-carnitine       | 1.014          | 0.011        | 0.599           | 1.047          | 0.021        | 0.264           | 0.170      |
| carnitine c5:0          | 0.990          | 9.49 e-3     | 0.713           | 1.008          | 0.021        | 0.851           | 0.450      |
| carnitine c5:1          | 1.015          | 0.027        | 0.860           | 1.047          | 0.039        | 0.707           | 0.502      |
| carnitine c6:0          | 0.983          | 0.011        | 0.060           | 1.069          | 0.025        | 0.160           | 0.003      |
| carnitine c8:0          | <b>1.032</b>   | <b>0.012</b> | <b>0.015</b>    | 1.037          | 0.019        | 0.211           | 0.824      |
| carnitine c8:1          | 1.010          | 0.011        | 0.954           | 1.181          | 0.131        | 0.483           | 0.207      |
| carnitine c10:0         | <b>1.030</b>   | <b>0.010</b> | <b>0.024</b>    | <b>1.100</b>   | <b>0.022</b> | <b>8.48 e-4</b> | 0.008      |
| carnitine c10:1         | <b>1.033</b>   | <b>0.010</b> | <b>0.048</b>    | 1.062          | 0.022        | 0.146           | 0.256      |
| carnitine c10:2         | 1.031          | 0.014        | 0.066           | 1.025          | 0.024        | 0.781           | 0.843      |
| carnitine c10:3         | <b>1.074</b>   | <b>0.036</b> | <b>0.012</b>    | 0.995          | 0.014        | 0.912           | 0.045      |
| carnitine c12:0         | 1.037          | 0.029        | 0.546           | 1.054          | 0.028        | 0.261           | 0.771      |
| carnitine c12:1         | 1.012          | 0.011        | 0.421           | 1.008          | 0.016        | 0.996           | 0.843      |
| carnitine c12:2         | 1.045          | 0.025        | 0.394           | 1.071          | 0.031        | 0.195           | 0.519      |
| carnitine c14:0         | 1.006          | 0.020        | 0.955           | 1.007          | 0.035        | 0.963           | 0.981      |
| carnitine c14:1         | 0.983          | 0.018        | 0.264           | 1.019          | 0.030        | 0.928           | 0.311      |
| carnitine c14:2         | 0.985          | 0.011        | 0.463           | 1.045          | 0.028        | 0.653           | 0.052      |
| carnitine c16:0         | 1.028          | 0.028        | 0.822           | 1.027          | 0.065        | 0.928           | 0.985      |
| carnitine c16:1         | 1.017          | 0.037        | 0.750           | 1.033          | 0.028        | 0.928           | 0.737      |
| carnitine c16:2         | 1.001          | 0.027        | 0.292           | 1.120          | 0.088        | 0.684           | 0.208      |
| carnitine c18:0         | 1.017          | 0.021        | 0.940           | 1.078          | 0.072        | 0.992           | 0.421      |
| carnitine c18:1         | 0.985          | 8.41 e-3     | 0.364           | 1.073          | 0.035        | 0.085           | 0.024      |
| carnitine c18:2         | 1.017          | 0.014        | 0.728           | 1.033          | 0.028        | 0.747           | 0.617      |
| carnitine c20:0         | 1.046          | 0.039        | 0.989           | 1.167          | 0.128        | 0.659           | 0.377      |
| carnitine c24:0         | 1.010          | 0.015        | 0.701           | 0.959          | 0.050        | 0.685           | 0.335      |
| citrate                 | 1.050          | 0.022        | 0.077           | 1.072          | 0.041        | 0.406           | 0.644      |
| $\alpha$ -ketoglutarate | 0.979          | 0.019        | 0.369           | 1.037          | 0.020        | 0.365           | 0.038      |
| succinate               | <b>1.101</b>   | <b>0.012</b> | <b>2.72e-11</b> | <b>1.148</b>   | <b>0.049</b> | <b>3.06 e-3</b> | 0.361      |
| fumarate                | 1.042          | 0.017        | 0.088           | 1.040          | 0.037        | 0.558           | 0.957      |
| malate                  | 1.097          | 0.059        | 0.225           | 0.959          | 0.038        | 0.707           | 0.052      |

**Table S10. Uptake and release of indicated metabolites by the leg.** Data are average estimated uptake or release ( $\mu\text{M}$ )  $\pm$  standard error of indicated metabolites by the leg in patients with preserved or reduced ejection fraction (EF).  $p^*$ : 1-sample Wilcoxon rank-sum test with Benjamini-Hochberg correction. Red indicates significant uptake, blue indicates significant release. P-values for comparison of pEF vs. rEF were derived from a student's t-test; no p values for pEF vs. rEF comparison fell below a Bonferroni-adjusted critical value of 0.0002.

|                         | $C_{FV} - C_A$ |                 |                  |                |              |                 | Comparison<br>$p$ |
|-------------------------|----------------|-----------------|------------------|----------------|--------------|-----------------|-------------------|
|                         | Preserved EF   |                 |                  | Reduced EF     |              |                 |                   |
|                         | $C_{FV} / C_A$ | SEM             | $p^*$            | $C_{FV} / C_A$ | SEM          | $p^*$           |                   |
| carnitine               | 1.013          | 7.88 e-3        | 0.218            | 1.021          | 0.015        | 0.229           | 0.628             |
| acetyl-carnitine        | <b>0.948</b>   | <b>8.80 e-3</b> | <b>2.25 e-8</b>  | <b>1.001</b>   | <b>0.022</b> | <b>0.234</b>    | 0.035             |
| propionyl-carnitine     | 0.987          | 0.014           | 0.084            | 1.017          | 0.026        | 0.992           | 0.333             |
| butyryl-carnitine       | 0.991          | 0.011           | 0.059            | 1.015          | 0.023        | 0.843           | 0.362             |
| carnitine c5:0          | <b>1.052</b>   | <b>0.015</b>    | <b>1.20 e-4</b>  | 1.034          | 0.019        | 0.348           | 0.456             |
| carnitine c5:1          | 0.980          | 0.025           | 0.627            | 1.044          | 0.023        | 0.121           | 0.06              |
| carnitine c6:0          | <b>0.850</b>   | <b>0.013</b>    | <b>1.88 e-12</b> | <b>0.948</b>   | <b>0.026</b> | <b>0.037</b>    | 0.002             |
| carnitine c8:0          | <b>1.127</b>   | <b>0.015</b>    | <b>8.64 e-11</b> | <b>1.092</b>   | <b>0.019</b> | <b>6.82 e-4</b> | 0.146             |
| carnitine c8:1          | <b>0.844</b>   | <b>0.014</b>    | <b>1.58 e-10</b> | <b>1.057</b>   | <b>0.150</b> | <b>0.042</b>    | 0.172             |
| carnitine c10:0         | <b>1.133</b>   | <b>0.014</b>    | <b>2.02 e-12</b> | <b>1.115</b>   | <b>0.026</b> | <b>8.51 e-4</b> | 0.558             |
| carnitine c10:1         | <b>1.077</b>   | <b>0.014</b>    | <b>8.71 e-6</b>  | 1.063          | 0.025        | 0.076           | 0.629             |
| carnitine c10:2         | <b>1.048</b>   | <b>0.015</b>    | <b>9.64 e-3</b>  | 1.036          | 0.033        | 0.825           | 0.736             |
| carnitine c10:3         | <b>1.039</b>   | <b>0.020</b>    | <b>0.044</b>     | 1.020          | 0.017        | 0.542           | 0.469             |
| carnitine c12:0         | 1.042          | 0.024           | 0.358            | 1.048          | 0.029        | 0.646           | 0.874             |
| carnitine c12:1         | 1.005          | 0.013           | 0.813            | 1.022          | 0.019        | 0.743           | 0.465             |
| carnitine c12:2         | 1.063          | 0.022           | 0.048            | <b>1.088</b>   | <b>0.029</b> | <b>0.039</b>    | 0.49              |
| carnitine c14:0         | <b>0.956</b>   | <b>0.023</b>    | <b>0.022</b>     | 0.953          | 0.028        | 0.276           | 0.949             |
| carnitine c14:1         | <b>0.964</b>   | <b>0.017</b>    | <b>2.69 e-3</b>  | 0.999          | 0.022        | 0.799           | 0.22              |
| carnitine c14:2         | <b>0.945</b>   | <b>0.013</b>    | <b>8.32 e-6</b>  | 1.015          | 0.025        | 0.925           | 0.018             |
| carnitine c16:0         | <b>0.966</b>   | <b>0.023</b>    | <b>0.021</b>     | 0.969          | 0.054        | 0.843           | 0.967             |
| carnitine c16:1         | 0.968          | 0.036           | 0.114            | 1.001          | 0.046        | 0.445           | 0.583             |
| carnitine c16:2         | <b>0.961</b>   | <b>0.031</b>    | <b>5.89 e-3</b>  | 1.086          | 0.063        | 0.979           | 0.084             |
| carnitine c18:0         | <b>0.988</b>   | <b>0.019</b>    | <b>0.044</b>     | 1.054          | 0.049        | 0.992           | 0.222             |
| carnitine c18:1         | <b>0.973</b>   | <b>0.013</b>    | <b>6.44 e-3</b>  | 1.059          | 0.030        | 0.234           | 0.015             |
| carnitine c18:2         | 0.996          | 0.018           | 0.493            | 1.007          | 0.028        | 0.911           | 0.735             |
| carnitine c20:0         | 1.002          | 0.032           | 0.804            | 1.014          | 0.062        | 0.849           | 0.871             |
| carnitine c24:0         | 0.982          | 0.016           | 0.234            | 1.058          | 0.044        | 0.542           | 0.117             |
| citrate                 | <b>1.209</b>   | <b>0.033</b>    | <b>2.08 e-8</b>  | <b>1.161</b>   | <b>0.061</b> | <b>0.042</b>    | 0.497             |
| $\alpha$ -ketoglutarate | 1.010          | 0.032           | 0.537            | <b>1.086</b>   | <b>0.029</b> | <b>0.012</b>    | 0.081             |
| succinate               | <b>1.191</b>   | <b>0.014</b>    | <b>8.83 e-13</b> | <b>1.118</b>   | <b>0.034</b> | <b>8.55 e-3</b> | 0.056             |
| fumarate                | <b>1.117</b>   | <b>0.023</b>    | <b>6.27 e-5</b>  | 1.078          | 0.035        | 0.250           | 0.372             |
| malate                  | <b>1.108</b>   | <b>0.033</b>    | <b>7.08 e-4</b>  | 1.001          | 0.034        | 0.849           | 0.028             |

**Data S1. Summary of  $C_{CS}/C_A$  and  $C_{FV}/C_A$  for all metabolites from all patients.**

**Column Headings:**

**FV\_over\_A\_pEF** or **CS\_over\_A\_pEF**: Mean  $C_{FV}/C_A$  or  $C_{CS}/C_A$  for indicated metabolite from preserved EF (pEF) cohort.

**FV\_over\_A\_pEF\_sem** or **CS\_over\_A\_pEF\_sem**: Standard error of  $C_{FV}/C_A$  or  $C_{CS}/C_A$  for indicated metabolite from pEF cohort.

**Raw\_p\_FV\_over\_A\_pEF** or **Raw\_p\_CS\_over\_A\_pEF**: Raw p value from Wilcoxon signed rank test with  $H_0: C_{FV}/C_A$  or  $C_{CS}/C_A = 1$ , pEF cohort.

**BH\_p\_FV\_over\_A\_pEF** or **BH\_p\_CS\_over\_A\_pEF**: Benjamini-Hochberg corrected p value, pEF cohort.

**FV\_over\_A\_rEF** or **CS\_over\_A\_rEF**: Mean  $C_{FV}/C_A$  or  $C_{CS}/C_A$  for indicated metabolite from reduced EF (rEF) cohort.

**FV\_over\_A\_sem\_rEF** or **CS\_over\_A\_sem\_rEF**: Standard error of  $C_{FV}/C_A$  or  $C_{CS}/C_A$  for indicated metabolite from rEF cohort.

**Raw\_p\_FV\_over\_A\_rEF** or **Raw\_p\_CS\_over\_A\_rEF**: Raw p value from Wilcoxon signed rank test with  $H_0: C_{FV}/C_A$  or  $C_{CS}/C_A = 1$ , rEF cohort.

**BH\_p\_FV\_over\_A\_rEF** or **BH\_p\_CS\_over\_A\_rEF**: Benjamini-Hochberg corrected p value, rEF cohort.

“NA” values where FV or CS/A ratio available from <20 patients.

**Data S2.** Summary of  $p$  and  $r^2$  values for metabolite extraction correlations (corresponds to **Fig S7A-B**).

**Tab 1 (“CS\_A vs. CS\_A correlation”):** Corresponds to Fig S7A. Each row corresponds to a metabolite pairing.

**Tab 2 (“FV\_A vs. FV\_A correlation”):** Corresponds to Fig S7B. Each row corresponds to a metabolite pairing.

**Column “cor”:**  $r^2$  of correlation between compound 1 and compound 2.

**Column “p”:**  $p$  value of correlation between compound 1 and compound 2.

## References and Notes

1. M. F. Allard, B. O. Schönekeess, S. L. Henning, D. R. English, G. D. Lopaschuk, Contribution of oxidative metabolism and glycolysis to ATP production in hypertrophied hearts. *Am. J. Physiol.* **267**, H742–H750 (1994). [doi:10.1152/ajpheart.1994.267.2.H742](https://doi.org/10.1152/ajpheart.1994.267.2.H742) [Medline](#)
2. S. Neubauer, The failing heart—An engine out of fuel. *N. Engl. J. Med.* **356**, 1140–1151 (2007). [doi:10.1056/NEJMra063052](https://doi.org/10.1056/NEJMra063052) [Medline](#)
3. J. Ivanisevic, D. Elias, H. Deguchi, P. M. Averell, M. Kurczy, C. H. Johnson, R. Tautenhahn, Z. Zhu, J. Watrous, M. Jain, J. Griffin, G. J. Patti, G. Siuzdak, Arteriovenous blood metabolomics: A readout of intra-tissue metabostasis. *Sci. Rep.* **5**, 12757 (2015). [doi:10.1038/srep12757](https://doi.org/10.1038/srep12757) [Medline](#)
4. Y. Mizuno, E. Harada, H. Nakagawa, Y. Morikawa, M. Shono, F. Kugimiya, M. Yoshimura, H. Yasue, The diabetic heart utilizes ketone bodies as an energy source. *Metabolism* **77**, 65–72 (2017). [doi:10.1016/j.metabol.2017.08.005](https://doi.org/10.1016/j.metabol.2017.08.005) [Medline](#)
5. J. A. Wisneski, E. W. Gertz, R. A. Neese, L. D. Gruenke, D. L. Morris, J. C. Craig, Metabolic fate of extracted glucose in normal human myocardium. *J. Clin. Invest.* **76**, 1819–1827 (1985). [doi:10.1172/JCI112174](https://doi.org/10.1172/JCI112174) [Medline](#)
6. D. S. Wishart, Y. D. Feunang, A. Marcu, A. C. Guo, K. Liang, R. Vázquez-Fresno, T. Sajed, D. Johnson, C. Li, N. Karu, Z. Sayeeda, E. Lo, N. Assempour, M. Berjanskii, S. Singhal, D. Arndt, Y. Liang, H. Badran, J. Grant, A. Serra-Cayuela, Y. Liu, R. Mandal, V. Neveu, A. Pon, C. Knox, M. Wilson, C. Manach, A. Scalbert, HMDB 4.0: The human metabolome database for 2018. *Nucleic Acids Res.* **46** (D1), D608–D617 (2018). [doi:10.1093/nar/gkx1089](https://doi.org/10.1093/nar/gkx1089) [Medline](#)
7. L. R. Peterson, P. Herrero, J. McGill, K. B. Schechtman, Z. Kisrieva-Ware, D. Lesniak, R. J. Gropler, Fatty acids and insulin modulate myocardial substrate metabolism in humans with type 1 diabetes. *Diabetes* **57**, 32–40 (2008). [doi:10.2337/db07-1199](https://doi.org/10.2337/db07-1199) [Medline](#)
8. G. D. Hutchins, M. Schwaiger, K. C. Rosenspire, J. Krivokapich, H. Schelbert, D. E. Kuhl, Noninvasive quantification of regional blood flow in the human heart using N-13 ammonia and dynamic positron emission tomographic imaging. *J. Am. Coll. Cardiol.* **15**, 1032–1042 (1990). [doi:10.1016/0735-1097\(90\)90237-J](https://doi.org/10.1016/0735-1097(90)90237-J) [Medline](#)
9. R. H. Nelson, A. Prasad, A. Lerman, J. M. Miles, Myocardial uptake of circulating triglycerides in nondiabetic patients with heart disease. *Diabetes* **56**, 527–530 (2007). [doi:10.2337/db06-1552](https://doi.org/10.2337/db06-1552) [Medline](#)
10. R. J. Perry, L. Peng, N. A. Barry, G. W. Cline, D. Zhang, R. L. Cardone, K. F. Petersen, R. G. Kibbey, A. L. Goodman, G. I. Shulman, Acetate mediates a microbiome-brain-β-cell axis to promote metabolic syndrome. *Nature* **534**, 213–217 (2016). [doi:10.1038/nature18309](https://doi.org/10.1038/nature18309) [Medline](#)
11. M. L. Soliman, T. A. Rosenberger, Acetate supplementation increases brain histone acetylation and inhibits histone deacetylase activity and expression. *Mol. Cell. Biochem.* **352**, 173–180 (2011). [doi:10.1007/s11010-011-0751-3](https://doi.org/10.1007/s11010-011-0751-3) [Medline](#)
12. P. B. Taylor, C. C. Liew, Acetylation of nuclear proteins in the isolated perfused rat heart. *Basic Res. Cardiol.* **71**, 27–35 (1976). [doi:10.1007/BF01907780](https://doi.org/10.1007/BF01907780) [Medline](#)

13. K. J. Peuhkurinen, I. E. Hassinen, Pyruvate carboxylation as an anaplerotic mechanism in the isolated perfused rat heart. *Biochem. J.* **202**, 67–76 (1982). [doi:10.1042/bj2020067](https://doi.org/10.1042/bj2020067) [Medline](#)
14. T. Takala, J. K. Hiltunen, I. E. Hassinen, The mechanism of ammonia production and the effect of mechanical work load on proteolysis and amino acid catabolism in isolated perfused rat heart. *Biochem. J.* **192**, 285–295 (1980). [doi:10.1042/bj1920285](https://doi.org/10.1042/bj1920285) [Medline](#)
15. H. Taegtmeier, A. G. Ferguson, M. Lesch, Protein degradation and amino acid metabolism in autolyzing rabbit myocardium. *Exp. Mol. Pathol.* **26**, 52–62 (1977). [doi:10.1016/0014-4800\(77\)90065-X](https://doi.org/10.1016/0014-4800(77)90065-X) [Medline](#)
16. O. I. Pisarenko, E. S. Solomatina, I. M. Studneva, The role of amino acid catabolism in the formation of the tricarboxylic acid cycle intermediates and ammonia in anoxic rat heart. *Biochim. Biophys. Acta* **885**, 154–161 (1986). [doi:10.1016/0167-4889\(86\)90083-2](https://doi.org/10.1016/0167-4889(86)90083-2) [Medline](#)
17. G. H. A. Clowes Jr., H. T. Randall, C.-J. Cha, Amino acid and energy metabolism in septic and traumatized patients. *JPEN J. Parenter. Enteral Nutr.* **4**, 195–205 (1980). [doi:10.1177/014860718000400225](https://doi.org/10.1177/014860718000400225) [Medline](#)
18. V. R. Preedy, L. Paska, P. H. Sugden, P. S. Schofield, M. C. Sugden, The effects of surgical stress and short-term fasting on protein synthesis in vivo in diverse tissues of the mature rat. *Biochem. J.* **250**, 179–188 (1988). [doi:10.1042/bj2500179](https://doi.org/10.1042/bj2500179) [Medline](#)
19. H. Sun, K. C. Olson, C. Gao, D. A. Prosdocimo, M. Zhou, Z. Wang, D. Jeyaraj, J.-Y. Youn, S. Ren, Y. Liu, C. D. Rau, S. Shah, O. Ilkayeva, W.-J. Gui, N. S. William, R. M. Wynn, C. B. Newgard, H. Cai, X. Xiao, D. T. Chuang, P. C. Schulze, C. Lynch, M. K. Jain, Y. Wang, Catabolic defect of branched-chain amino acids promotes heart failure. *Circulation* **133**, 2038–2049 (2016). [doi:10.1161/CIRCULATIONAHA.115.020226](https://doi.org/10.1161/CIRCULATIONAHA.115.020226) [Medline](#)
20. T. Li, Z. Zhang, S. C. Kolwicz Jr., L. Abell, N. D. Roe, M. Kim, B. Zhou, Y. Cao, J. Ritterhoff, H. Gu, D. Raftery, H. Sun, R. Tian, Defective branched-chain amino acid catabolism disrupts glucose metabolism and sensitizes the heart to ischemia-reperfusion injury. *Cell Metab.* **25**, 374–385 (2017). [doi:10.1016/j.cmet.2016.11.005](https://doi.org/10.1016/j.cmet.2016.11.005) [Medline](#)
21. W. Wang, F. Zhang, Y. Xia, S. Zhao, W. Yan, H. Wang, Y. Lee, C. Li, L. Zhang, K. Lian, E. Gao, H. Cheng, L. Tao, Defective branched chain amino acid catabolism contributes to cardiac dysfunction and remodeling following myocardial infarction. *Am. J. Physiol. Heart Circ. Physiol.* **311**, H1160–H1169 (2016). [doi:10.1152/ajpheart.00114.2016](https://doi.org/10.1152/ajpheart.00114.2016) [Medline](#)
22. M. D. Neinast, C. Jang, S. Hui, D. S. Murashige, Q. Chu, R. J. Morscher, X. Li, L. Zhan, E. White, T. G. Anthony, J. D. Rabinowitz, Z. Arany, Quantitative analysis of the whole-body metabolic fate of branched-chain amino acids. *Cell Metab.* **29**, 417–429.e4 (2019). [doi:10.1016/j.cmet.2018.10.013](https://doi.org/10.1016/j.cmet.2018.10.013) [Medline](#)
23. D. J. Garry, G. A. Ordway, J. N. Lorenz, N. B. Radford, E. R. Chin, R. W. Grange, R. Bassel-Duby, R. S. Williams, Mice without myoglobin. *Nature* **395**, 905–908 (1998). [doi:10.1038/27681](https://doi.org/10.1038/27681) [Medline](#)

24. A. E. Romero-Herrera, H. Lehmann, The amino acid sequence of human myoglobin and its minor fractions. *Proc. R. Soc. London Ser. B* **186**, 249–279 (1974).  
[doi:10.1098/rspb.1974.0048](https://doi.org/10.1098/rspb.1974.0048) [Medline](#)
25. C. Commisso, S. M. Davidson, R. G. Soydaner-Azeloglu, S. J. Parker, J. J. Kamphorst, S. Hackett, E. Grabocka, M. Nofal, J. A. Drebin, C. B. Thompson, J. D. Rabinowitz, C. M. Metallo, M. G. Vander Heiden, D. Bar-Sagi, Macropinocytosis of protein is an amino acid supply route in Ras-transformed cells. *Nature* **497**, 633–637 (2013).  
[doi:10.1038/nature12138](https://doi.org/10.1038/nature12138) [Medline](#)
26. P. B. Garland, P. J. Randle, E. A. Newsholme, Citrate as an intermediary in the inhibition of phosphofructokinase in rat heart muscle by fatty acids, ketone bodies, pyruvate, diabetes and starvation. *Nature* **200**, 169–170 (1963). [doi:10.1038/200169a0](https://doi.org/10.1038/200169a0) [Medline](#)
27. B. Comte, G. Vincent, B. Bouchard, M. Jetté, S. Cordeau, C. D. Rosiers, A <sup>13</sup>C mass isotopomer study of anaplerotic pyruvate carboxylation in perfused rat hearts. *J. Biol. Chem.* **272**, 26125–26131 (1997). [doi:10.1074/jbc.272.42.26125](https://doi.org/10.1074/jbc.272.42.26125) [Medline](#)
28. A. R. Panchal, B. Comte, H. Huang, T. Kerwin, A. Darvish, C. des Rosiers, H. Brunengraber, W. C. Stanley, Partitioning of pyruvate between oxidation and anaplerosis in swine hearts. *Am. J. Physiol. Heart Circ. Physiol.* **279**, H2390–H2398 (2000).  
[doi:10.1152/ajpheart.2000.279.5.H2390](https://doi.org/10.1152/ajpheart.2000.279.5.H2390) [Medline](#)
29. H.-L. Noh, K. Okajima, J. D. Molkentin, S. Homma, I. J. Goldberg, Acute lipoprotein lipase deletion in adult mice leads to dyslipidemia and cardiac dysfunction. *Am. J. Physiol. Endocrinol. Metab.* **291**, E755–E760 (2006). [doi:10.1152/ajpendo.00111.2006](https://doi.org/10.1152/ajpendo.00111.2006) [Medline](#)
30. N. H. Banke, A. R. Wende, T. C. Leone, J. M. O'Donnell, E. D. Abel, D. P. Kelly, E. D. Lewandowski, Preferential oxidation of triacylglyceride-derived fatty acids in heart is augmented by the nuclear receptor PPARalpha. *Circ. Res.* **107**, 233–241 (2010).  
[doi:10.1161/CIRCRESAHA.110.221713](https://doi.org/10.1161/CIRCRESAHA.110.221713) [Medline](#)
31. Y. Xia, J. L. Zweier, Substrate control of free radical generation from xanthine oxidase in the postischemic heart. *J. Biol. Chem.* **270**, 18797–18803 (1995).  
[doi:10.1074/jbc.270.32.18797](https://doi.org/10.1074/jbc.270.32.18797) [Medline](#)
32. M. R. Laughlin, W. A. Petit Jr., R. G. Shulman, E. J. Barrett, Measurement of myocardial glycogen synthesis in diabetic and fasted rats. *Am. J. Physiol.* **258**, E184–E190 (1990).  
[doi:10.1152/ajpendo.1990.258.1.E184](https://doi.org/10.1152/ajpendo.1990.258.1.E184) [Medline](#)
33. C. A. Schneider, H. Taegtmeier, Fasting in vivo delays myocardial cell damage after brief periods of ischemia in the isolated working rat heart. *Circ. Res.* **68**, 1045–1050 (1991).  
[doi:10.1161/01.RES.68.4.1045](https://doi.org/10.1161/01.RES.68.4.1045) [Medline](#)
34. G. Evans, The glycogen content of the rat heart. *J. Physiol.* **82**, 468–480 (1934).  
[doi:10.1113/jphysiol.1934.sp003198](https://doi.org/10.1113/jphysiol.1934.sp003198) [Medline](#)
35. T. Ahmad, J. P. Kelly, R. W. McGarrah, A. S. Hellkamp, M. Fiuzat, J. M. Testani, T. S. Wang, A. Verma, M. D. Samsky, M. P. Donahue, O. R. Ilkayeva, D. E. Bowles, C. B. Patel, C. A. Milano, J. G. Rogers, G. M. Felker, C. M. O'Connor, S. H. Shah, W. E. Kraus, Prognostic implications of long-chain acylcarnitines in heart failure and reversibility with mechanical circulatory support. *J. Am. Coll. Cardiol.* **67**, 291–299 (2016). [doi:10.1016/j.jacc.2015.10.079](https://doi.org/10.1016/j.jacc.2015.10.079) [Medline](#)



36. W. G. Hunter, J. P. Kelly, R. W. McGarrah 3rd, M. G. Khouri, D. Craig, C. Haynes, O. Ilkayeva, R. D. Stevens, J. R. Bain, M. J. Muehlbauer, C. B. Newgard, G. M. Felker, A. F. Hernandez, E. J. Velazquez, W. E. Kraus, S. H. Shah, Metabolomic profiling identifies novel circulating biomarkers of mitochondrial dysfunction differentially elevated in heart failure with preserved versus reduced ejection fraction: Evidence for shared metabolic impairments in clinical heart failure. *J. Am. Heart Assoc.* **5**, e003190 (2016).  
[doi:10.1161/JAHA.115.003190](https://doi.org/10.1161/JAHA.115.003190) [Medline](#)
37. K. C. Bedi Jr., N. W. Snyder, J. Brandimarto, M. Aziz, C. Mesaros, A. J. Worth, L. L. Wang, A. Javaheri, I. A. Blair, K. B. Margulies, J. E. Rame, Evidence for Intramyocardial Disruption of Lipid Metabolism and Increased Myocardial Ketone Utilization in Advanced Human Heart Failure. *Circulation* **133**, 706–716 (2016).  
[doi:10.1161/CIRCULATIONAHA.115.017545](https://doi.org/10.1161/CIRCULATIONAHA.115.017545) [Medline](#)
38. R. Nielsen, N. Møller, L. C. Gormsen, L. P. Tolbod, N. H. Hansson, J. Sorensen, H. J. Harms, J. Frøkiær, H. Eiskjaer, N. R. Jespersen, S. Mellemkjaer, T. R. Lassen, K. Pryds, H. E. Bøtker, H. Wiggers, Cardiovascular effects of treatment with the ketone body 3-hydroxybutyrate in chronic heart failure patients. *Circulation* **139**, 2129–2141 (2019).  
[doi:10.1161/CIRCULATIONAHA.118.036459](https://doi.org/10.1161/CIRCULATIONAHA.118.036459) [Medline](#)
39. G. Van Hall, B. Saltin, A. J. M. Wagenmakers, Muscle protein degradation and amino acid metabolism during prolonged knee-extensor exercise in humans. *Clin. Sci. (Lond.)* **97**, 557–567 (1999). [doi:10.1042/cs0970557](https://doi.org/10.1042/cs0970557) [Medline](#)
40. H. Taegtmeier, “Principles of fuel metabolism in heart muscle,” in *Myocardial Energy Metabolism, Volume 91 of Developments in Cardiovascular Medicine*, J. W. de Jong, Ed. (Springer, 1988), pp. 17–34.
41. B. V. Reddy, B. R. Prasad, S. N. Sinha, N. Ahmed, New mathematical derivations for calculation of ATP yield due to the complete oxidation of different types of fatty acids. *Indian J. Biochem. Biophys.* **51**, 52–57 (2014). [Medline](#)
42. M. Board, C. Lopez, C. van den Bos, R. Callaghan, K. Clarke, C. Carr, Acetoacetate is a more efficient energy-yielding substrate for human mesenchymal stem cells than glucose and generates fewer reactive oxygen species. *Int. J. Biochem. Cell Biol.* **88**, 75–83 (2017). [doi:10.1016/j.biocel.2017.05.007](https://doi.org/10.1016/j.biocel.2017.05.007) [Medline](#)
43. H. A. Krebs, “The metabolic fate of amino acids,” in *Mammalian Protein Metabolism*, H. N. Munro, J. B. Allison, Eds. (Academic, 1964), vol. I, pp. 125–176.
